# Supplementary figures and images for: Dichlorination of olefins with NCS/Ph3P
Source: Royal Society of Chemistry journal article supplement (doi:10.1039/c3ob27345h), 2013-01-01

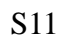

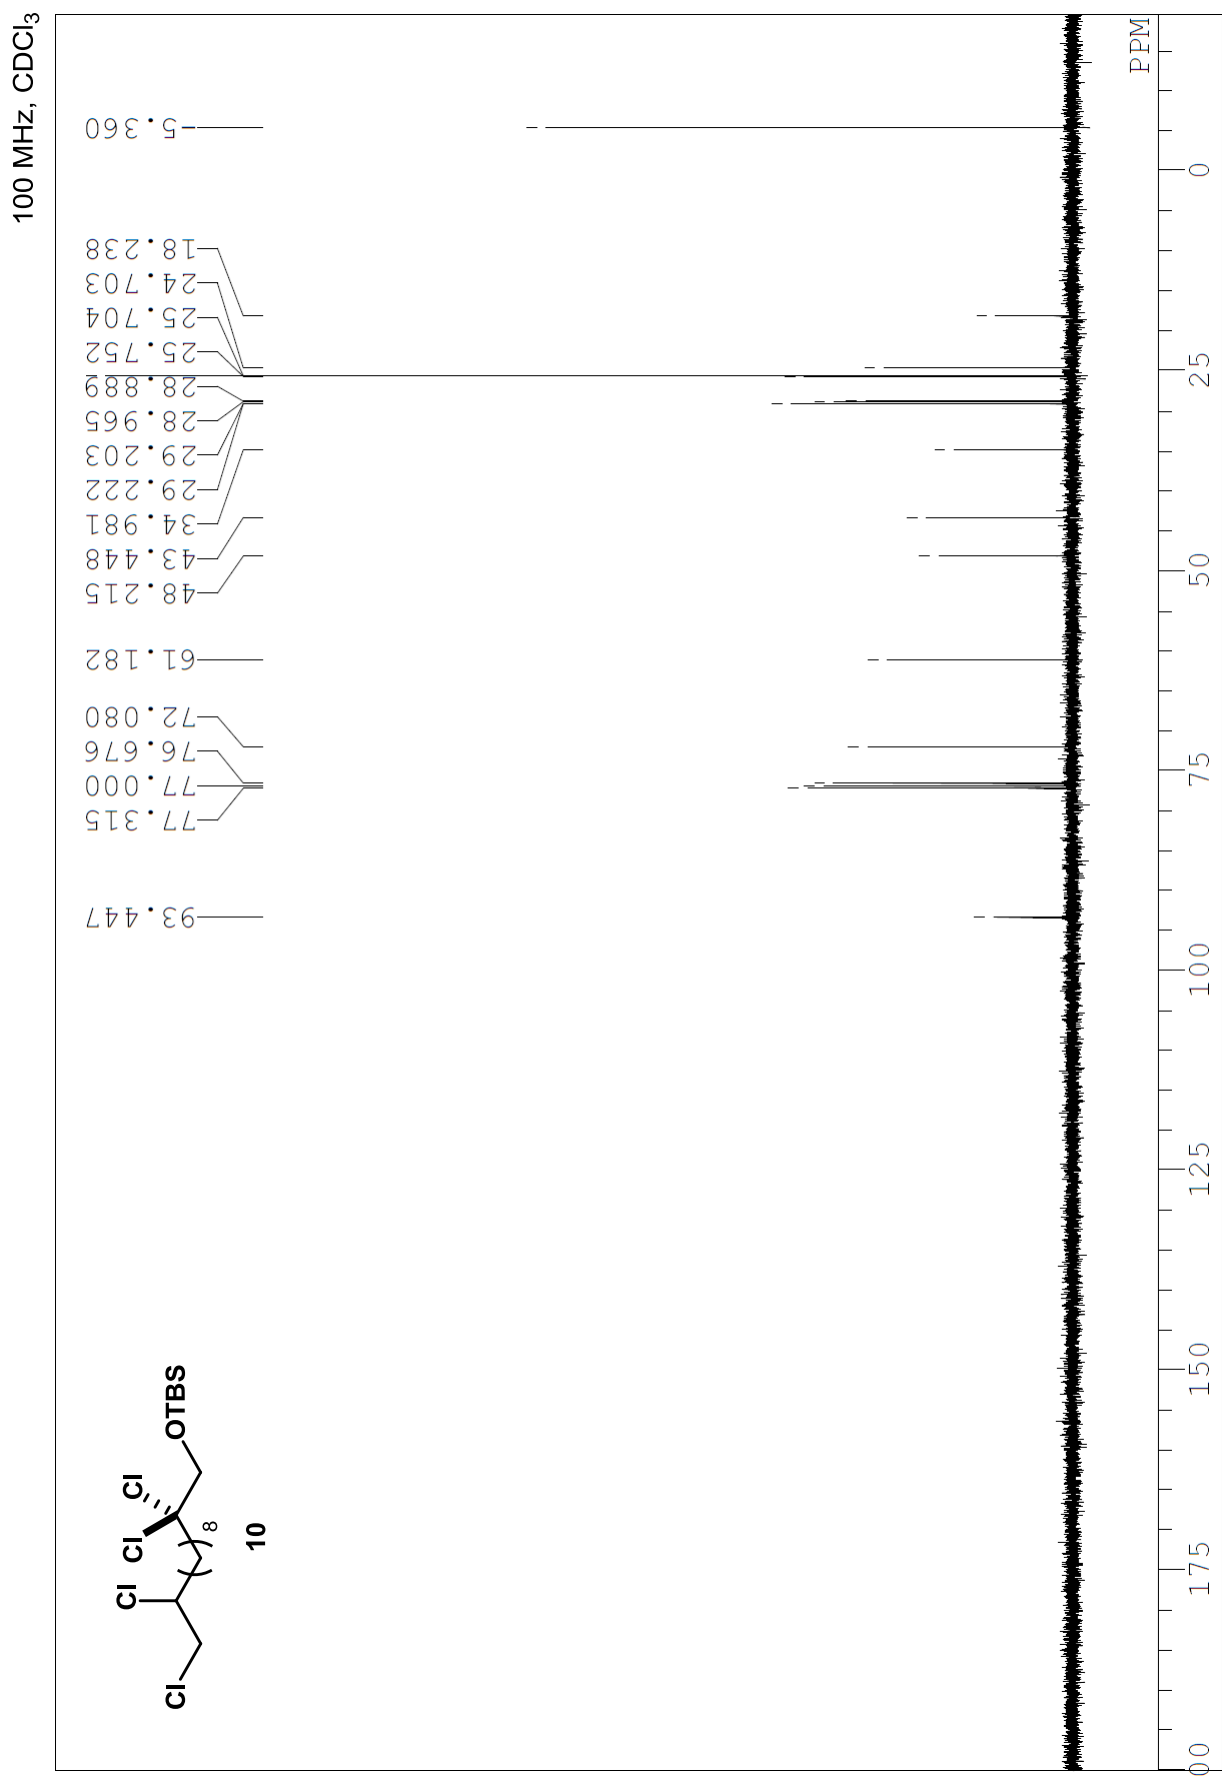

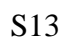

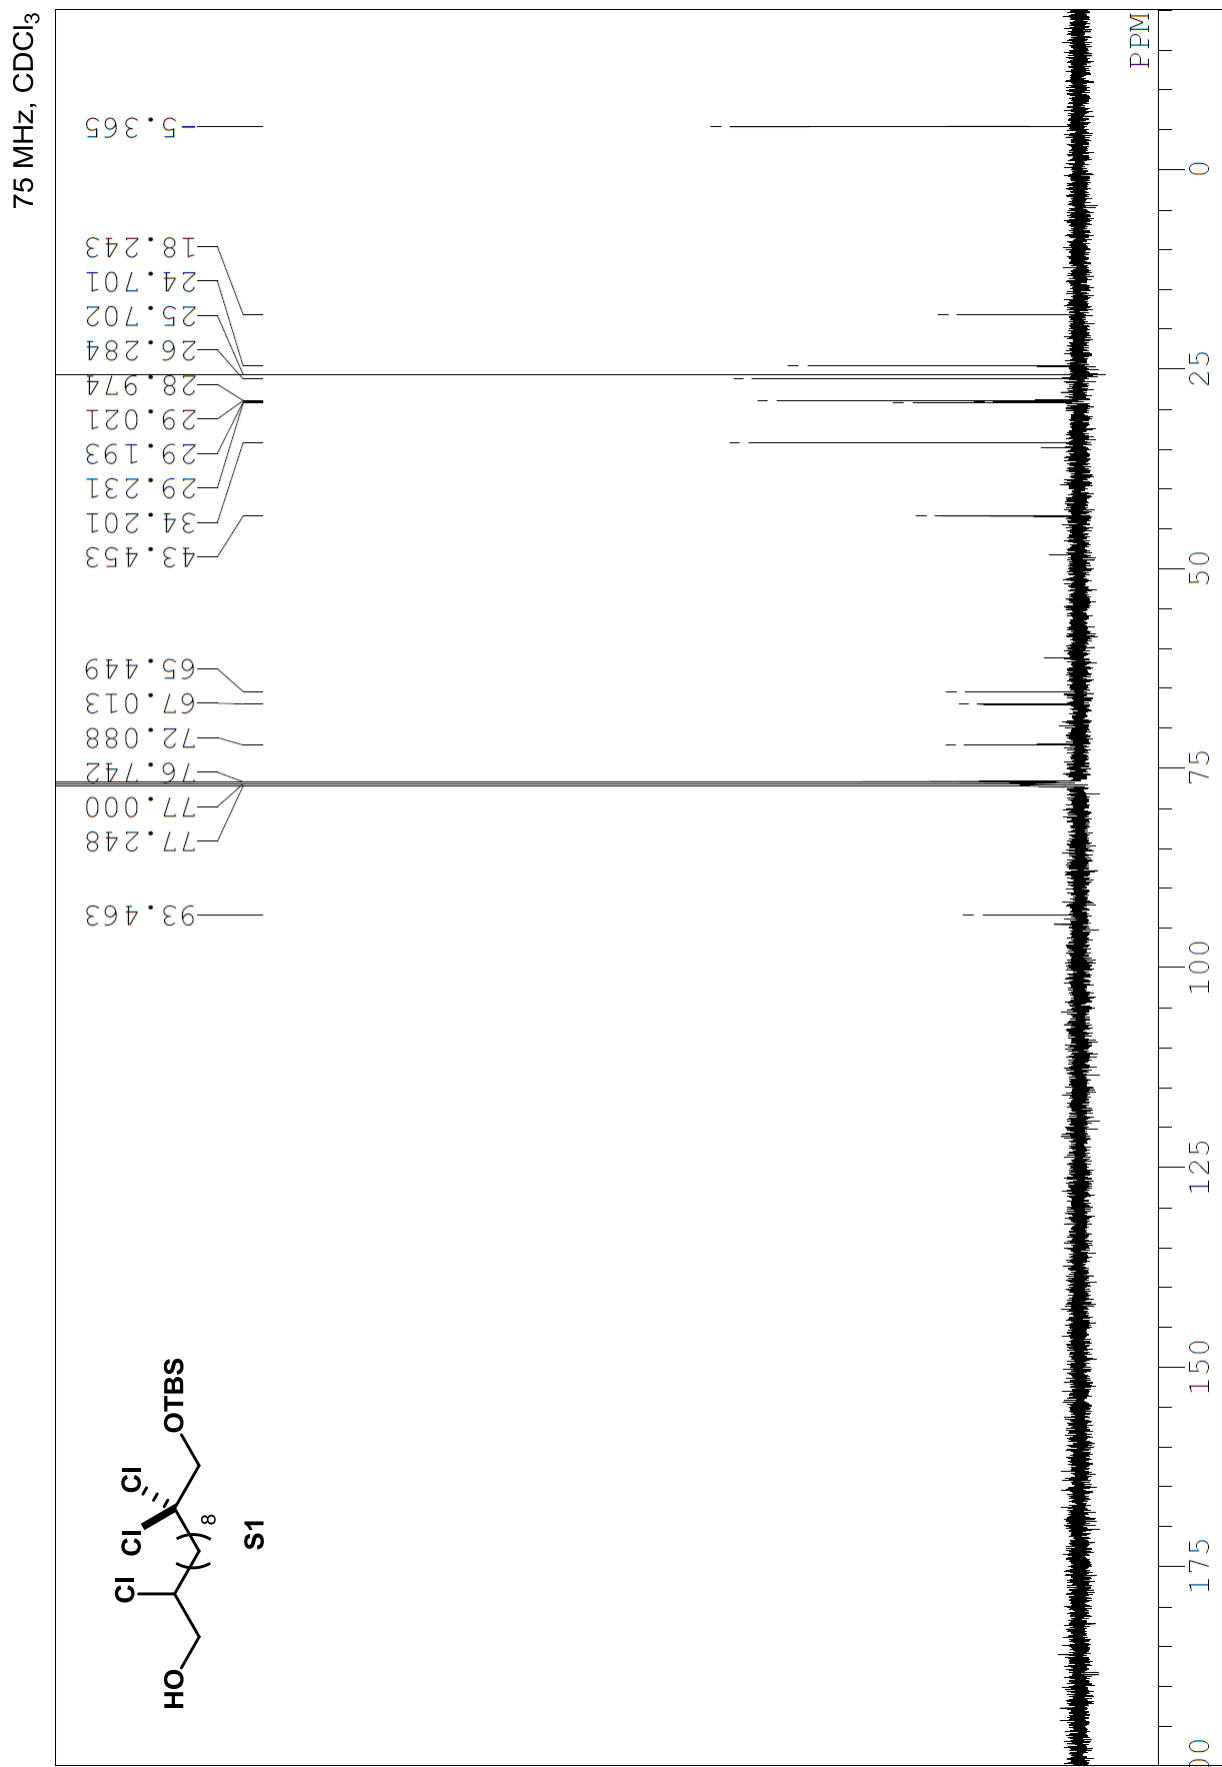

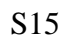

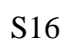

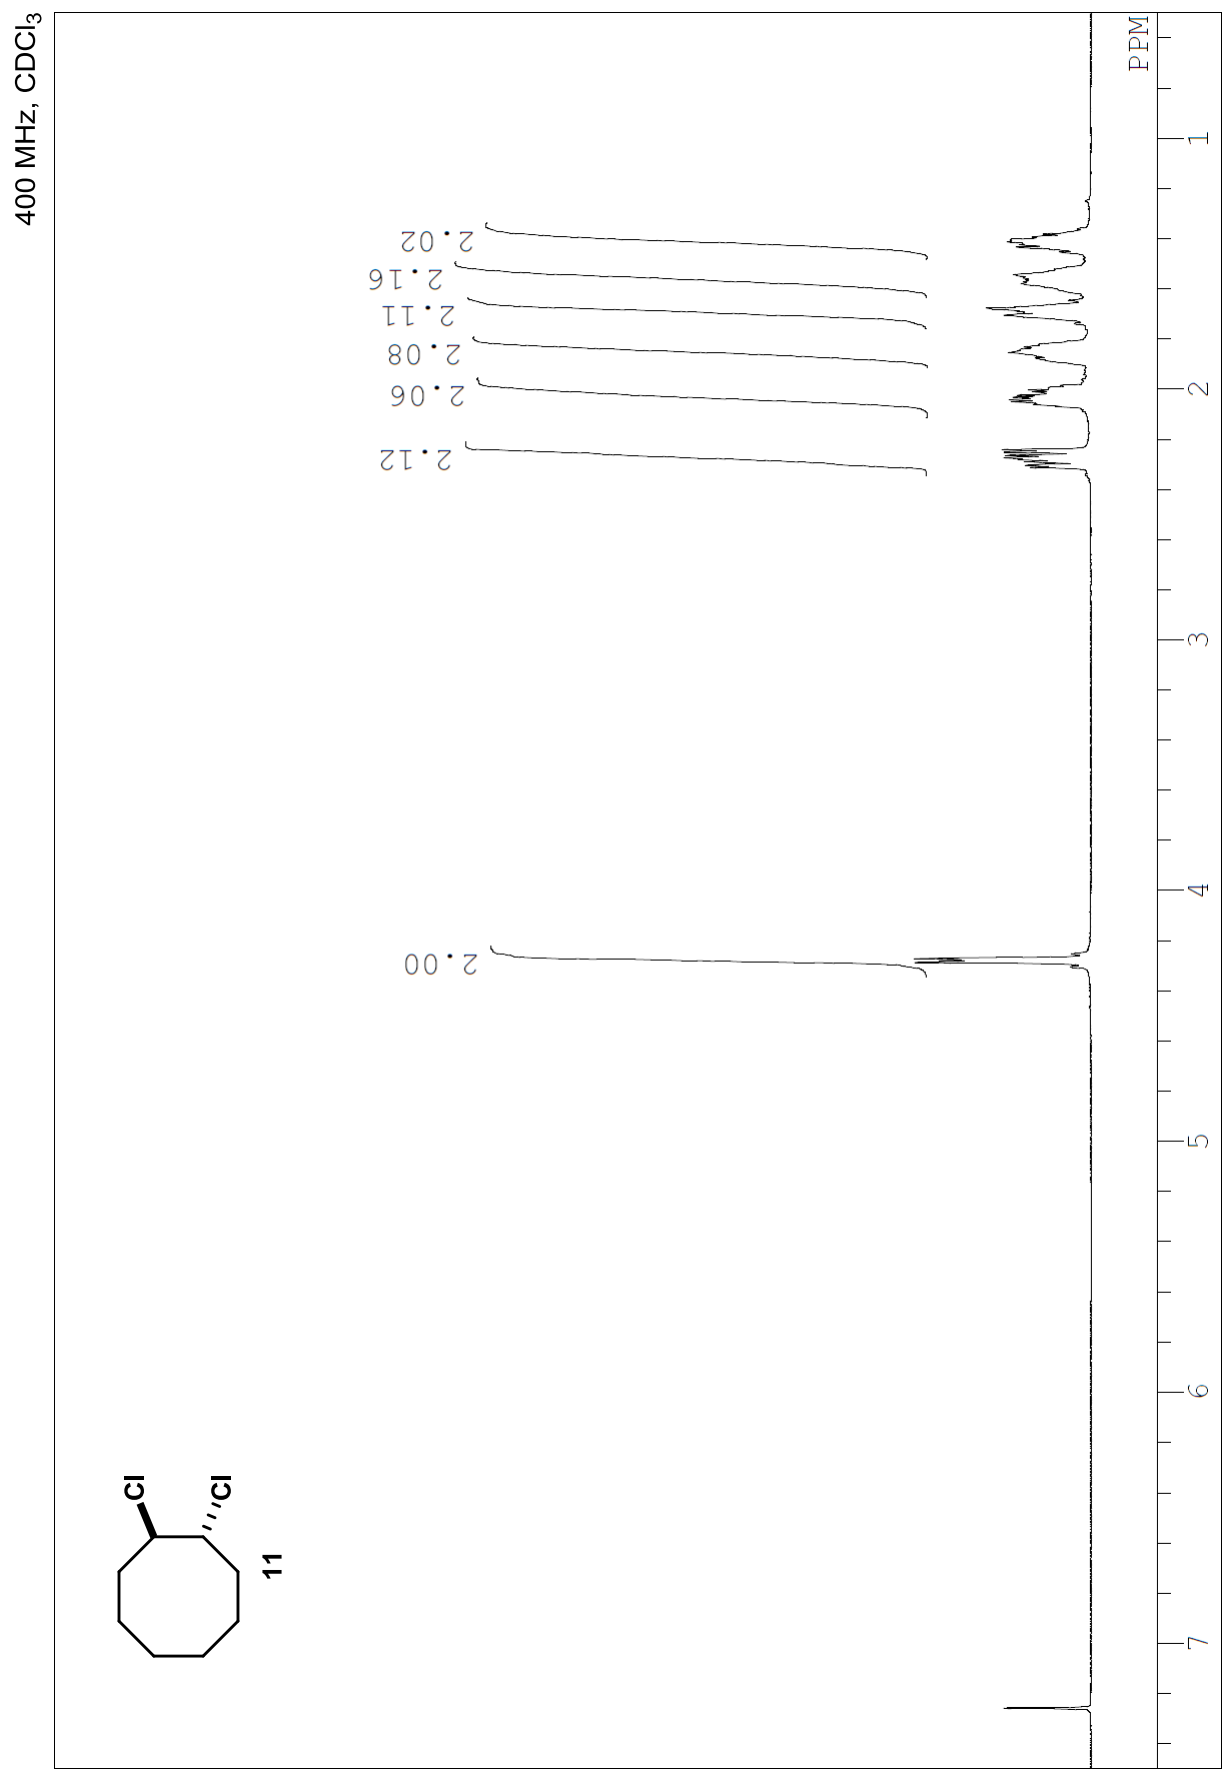

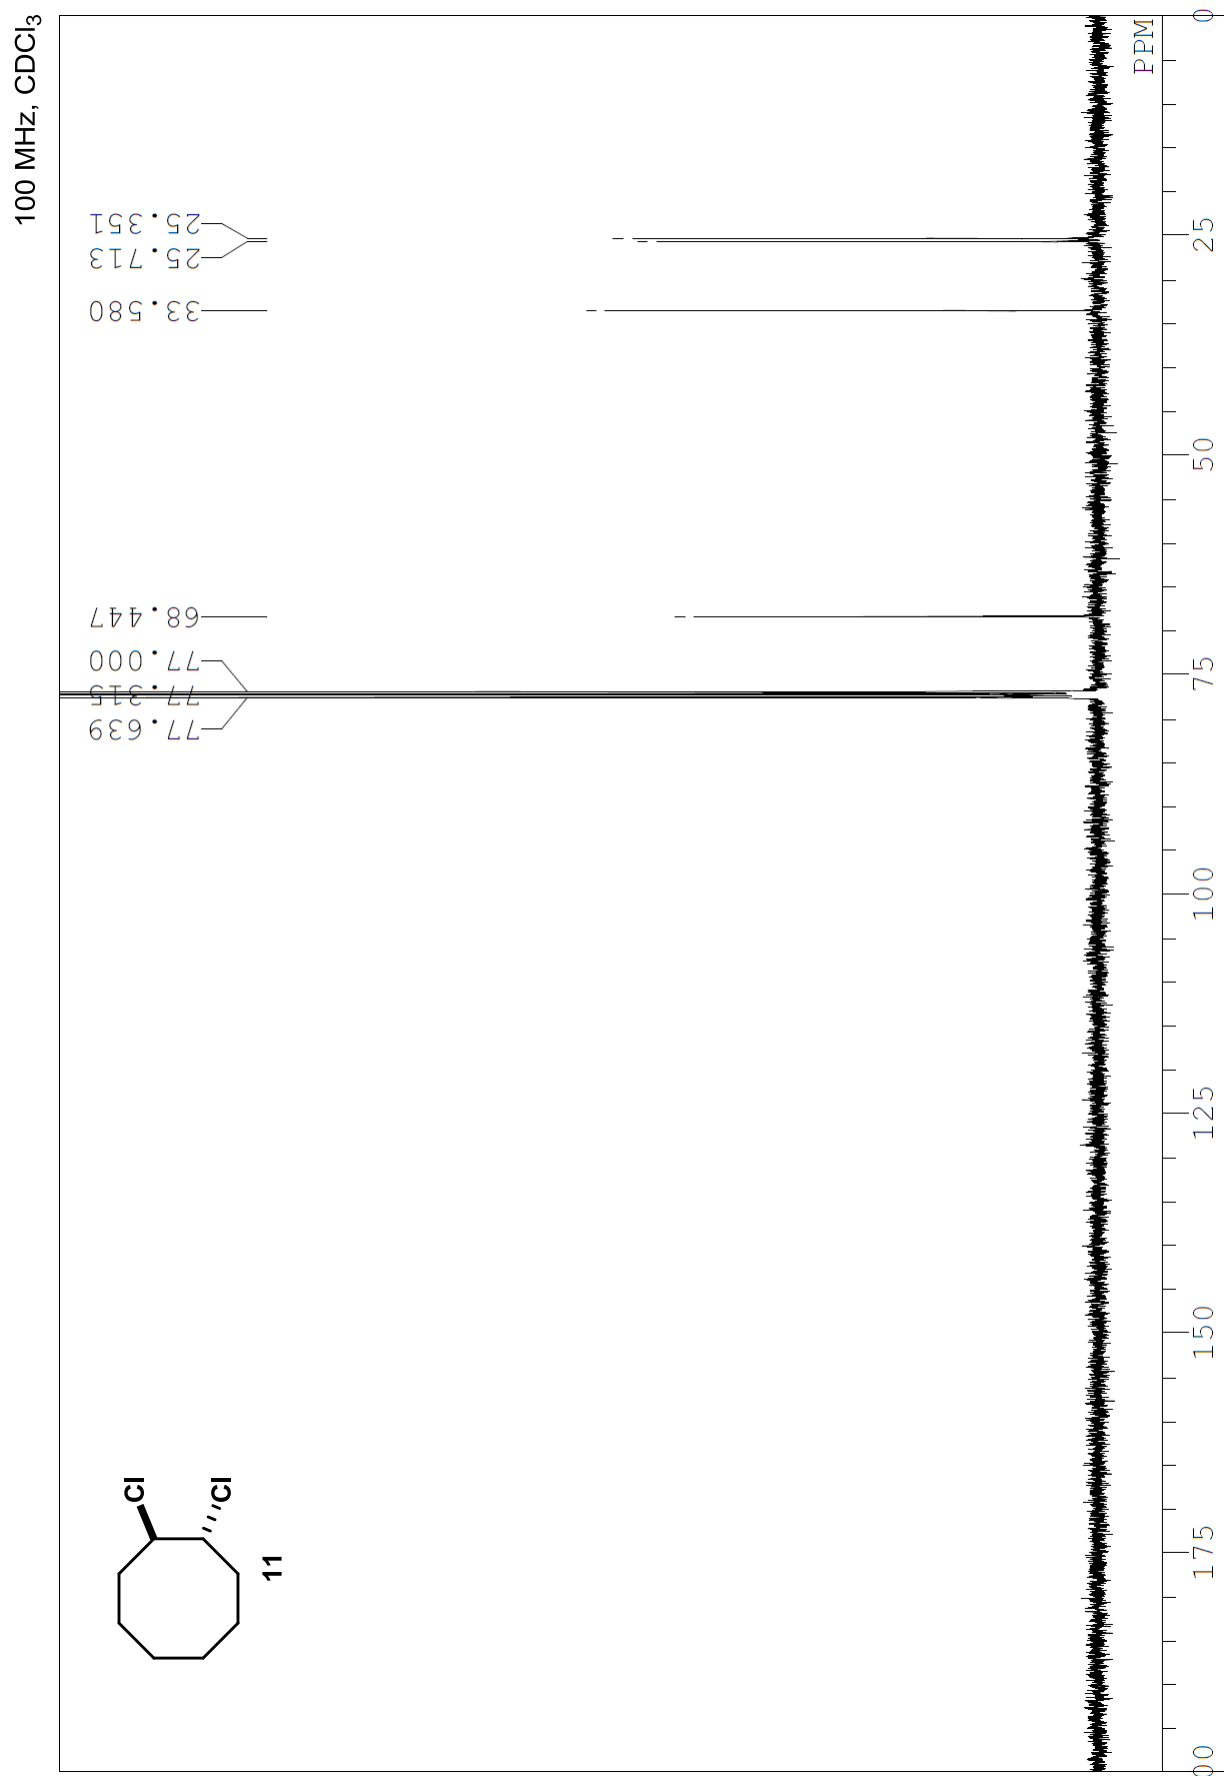



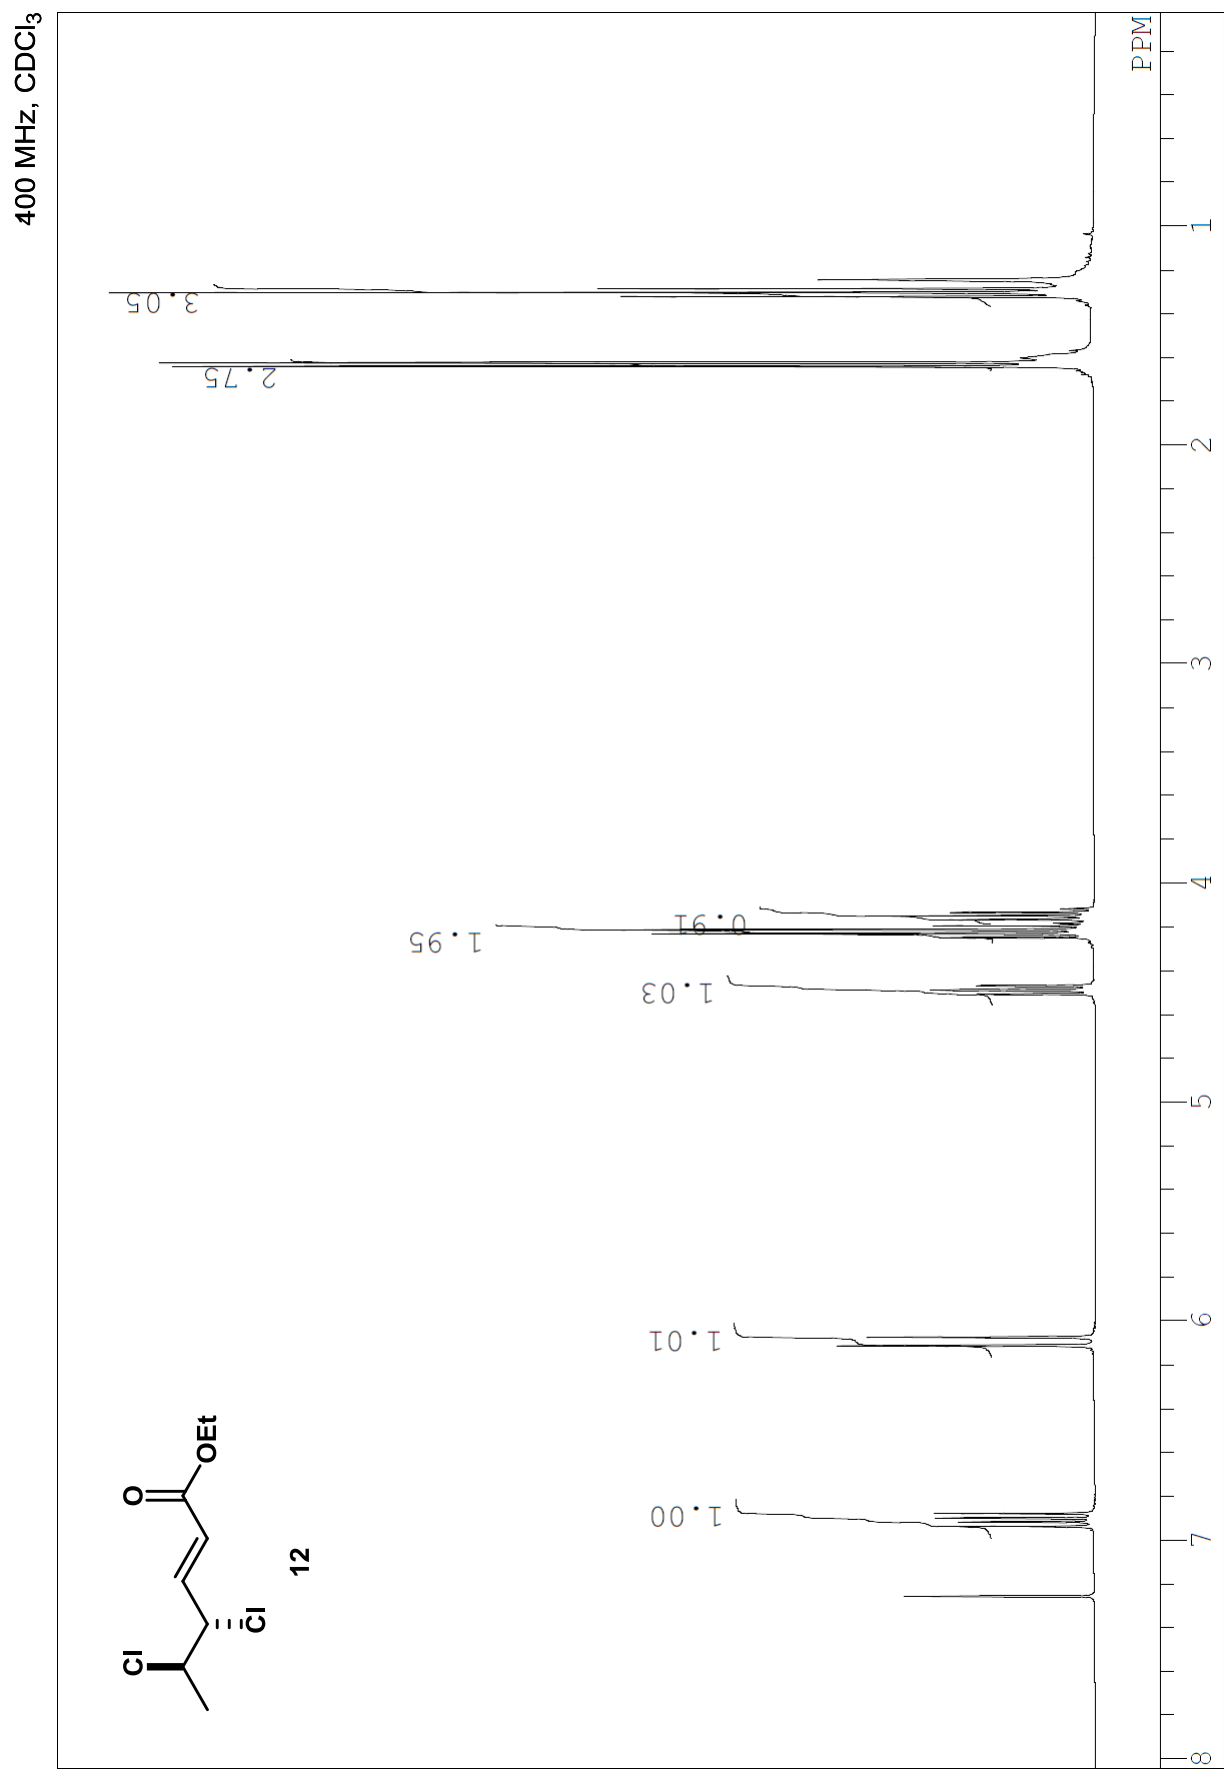

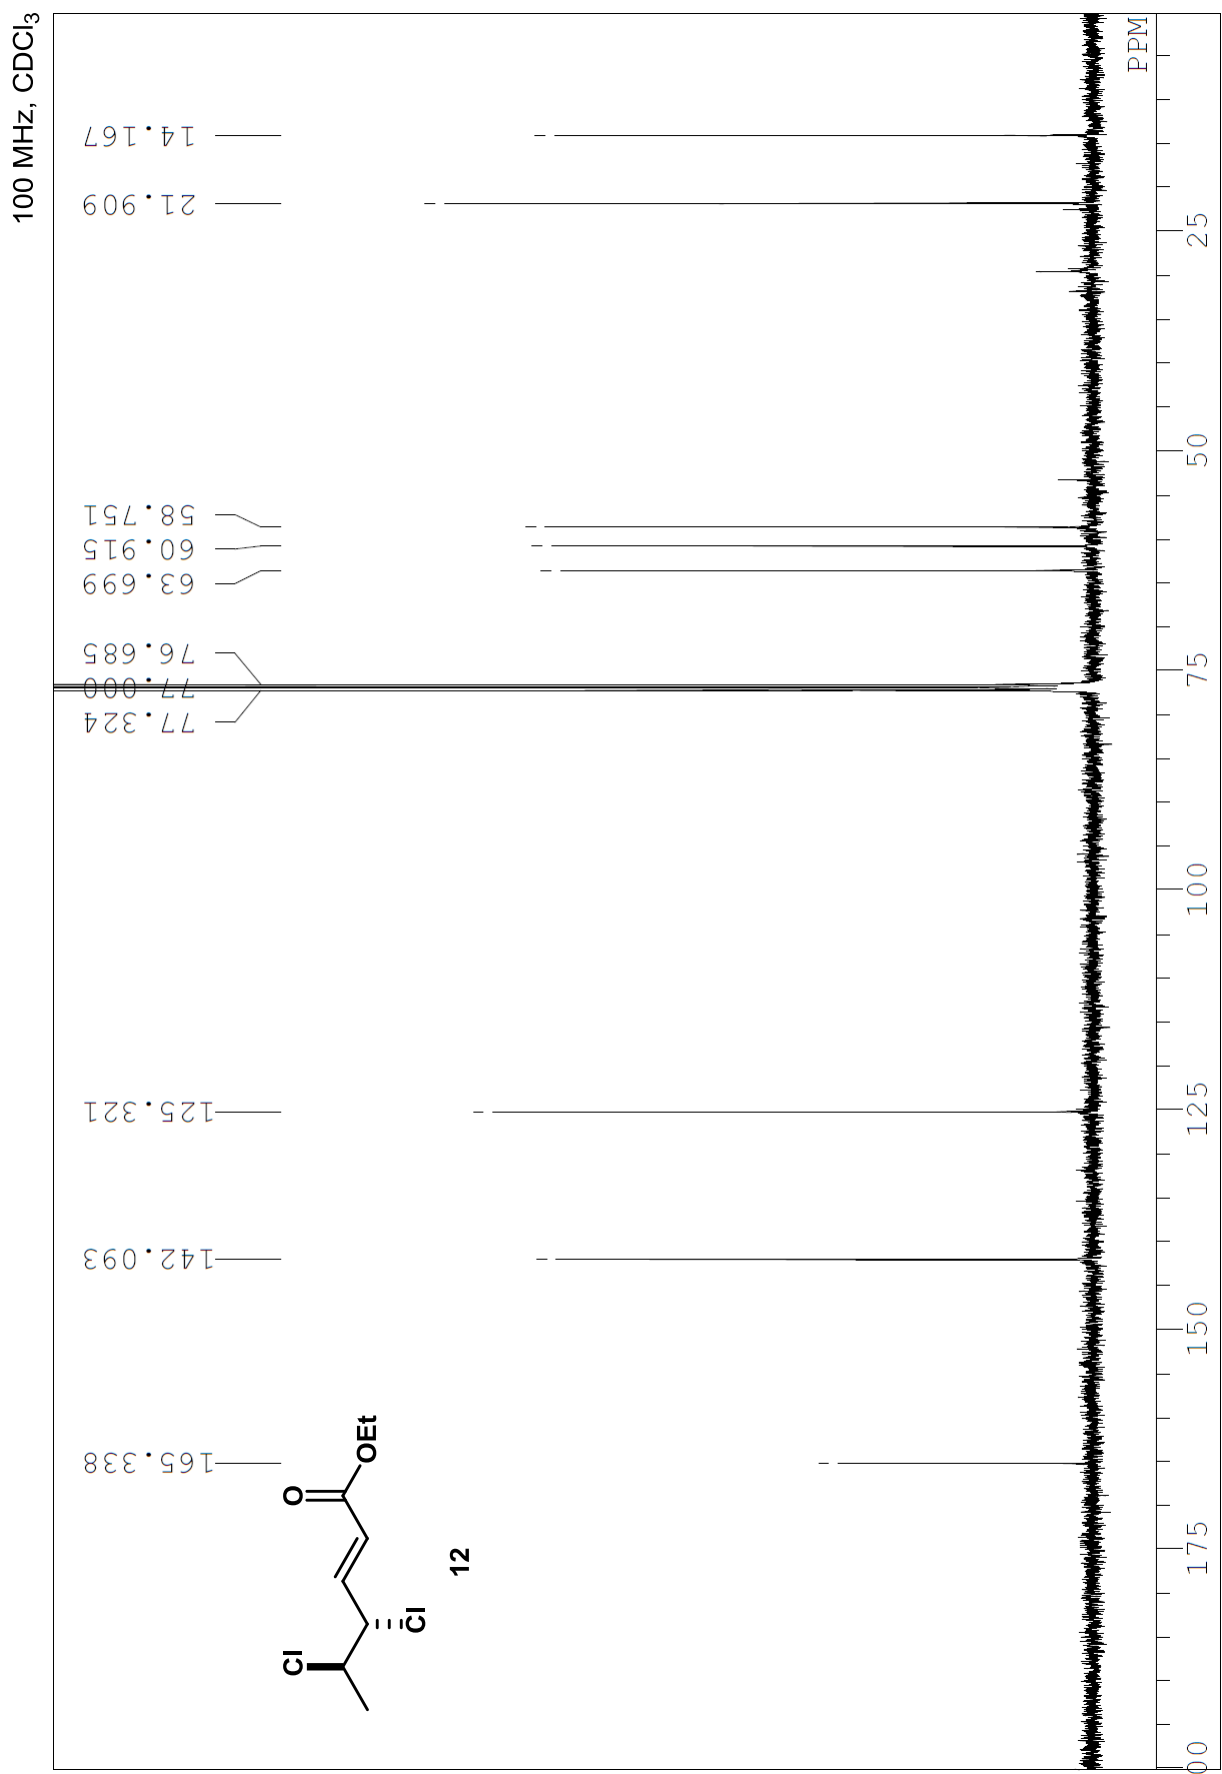

400 MHz, CDCl<sub>3</sub>

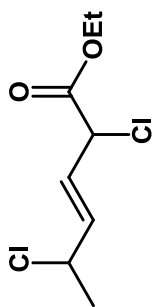

13

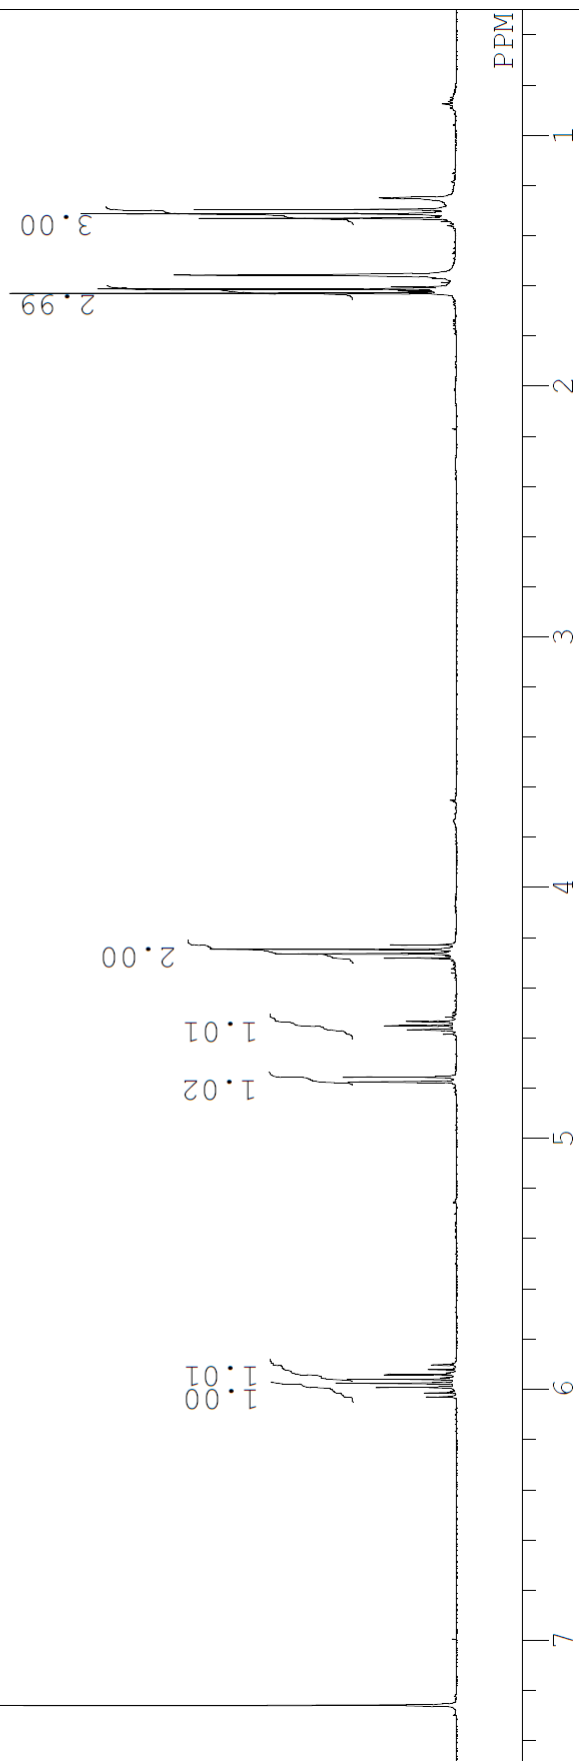

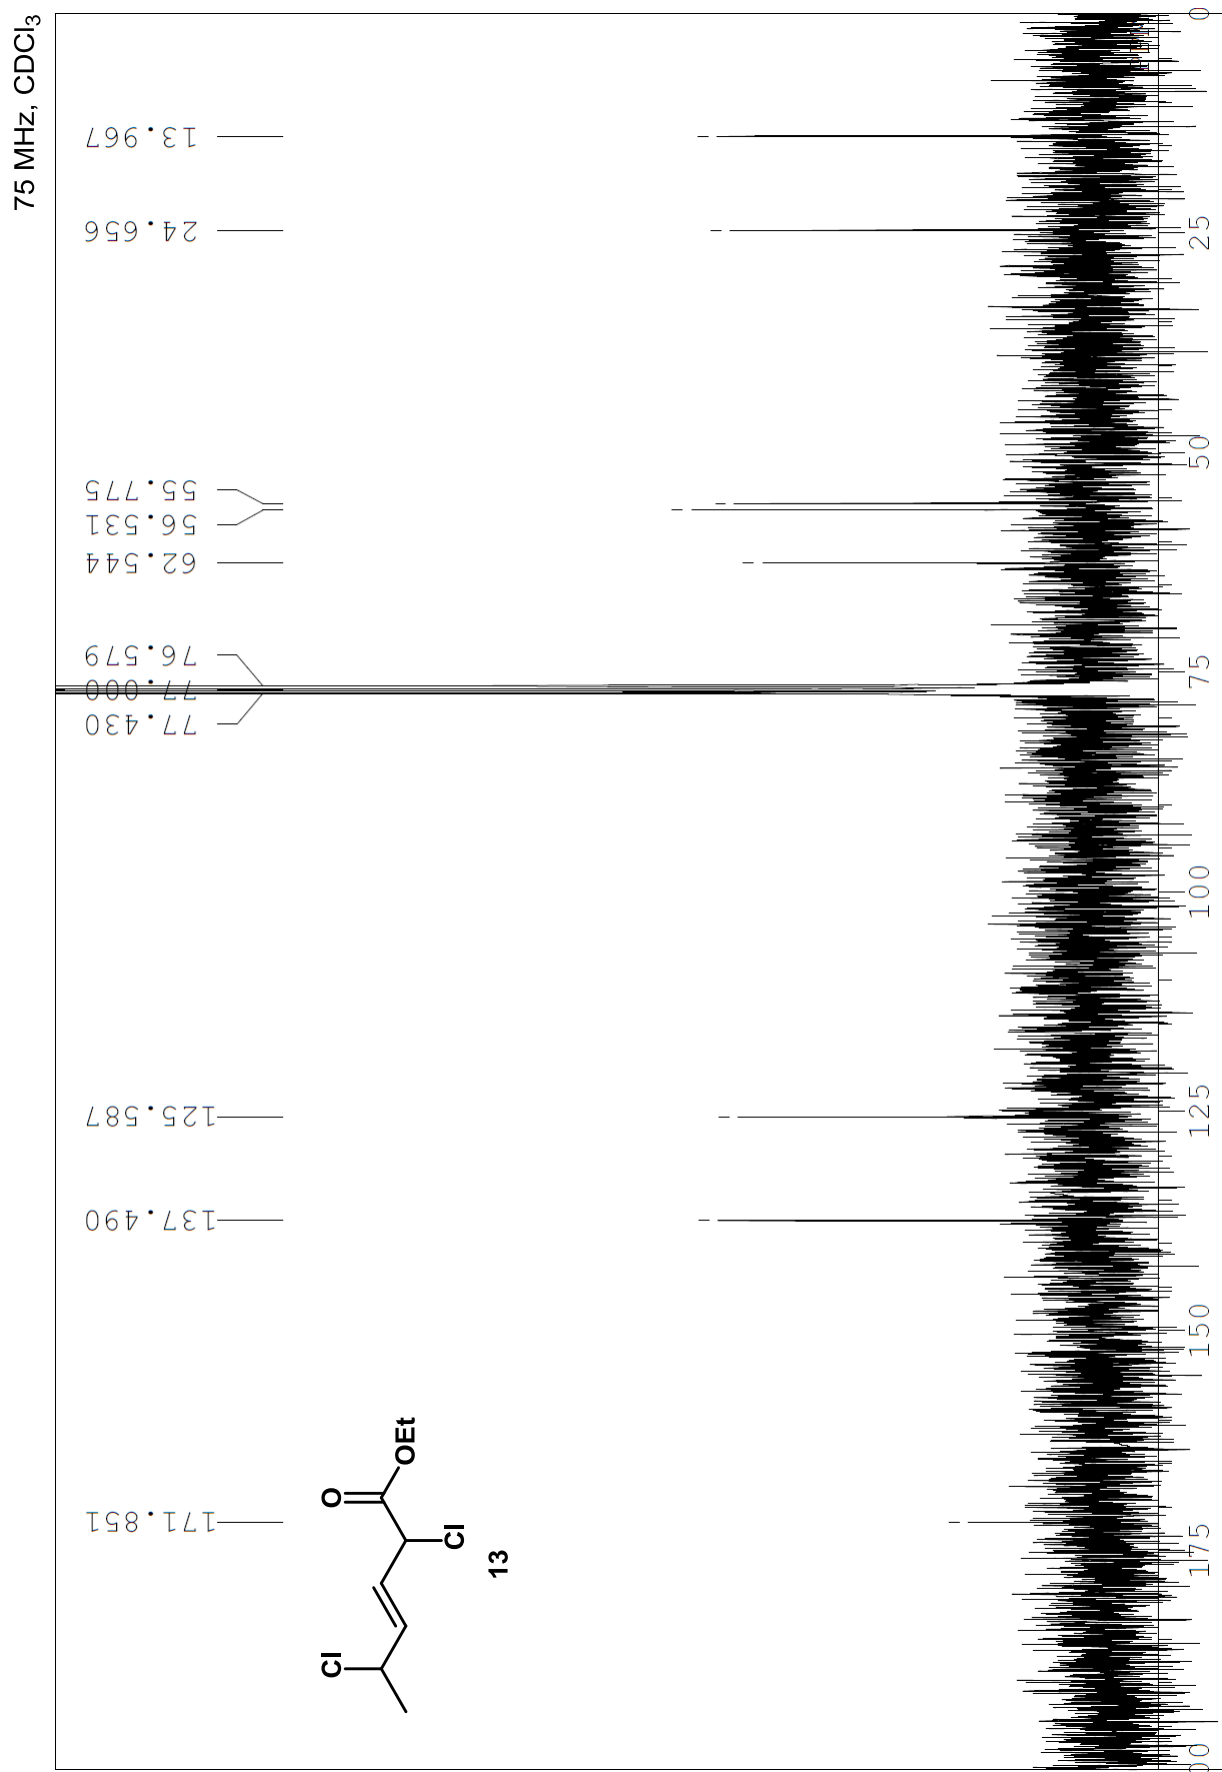

400 MHz, CDCl<sub>3</sub>

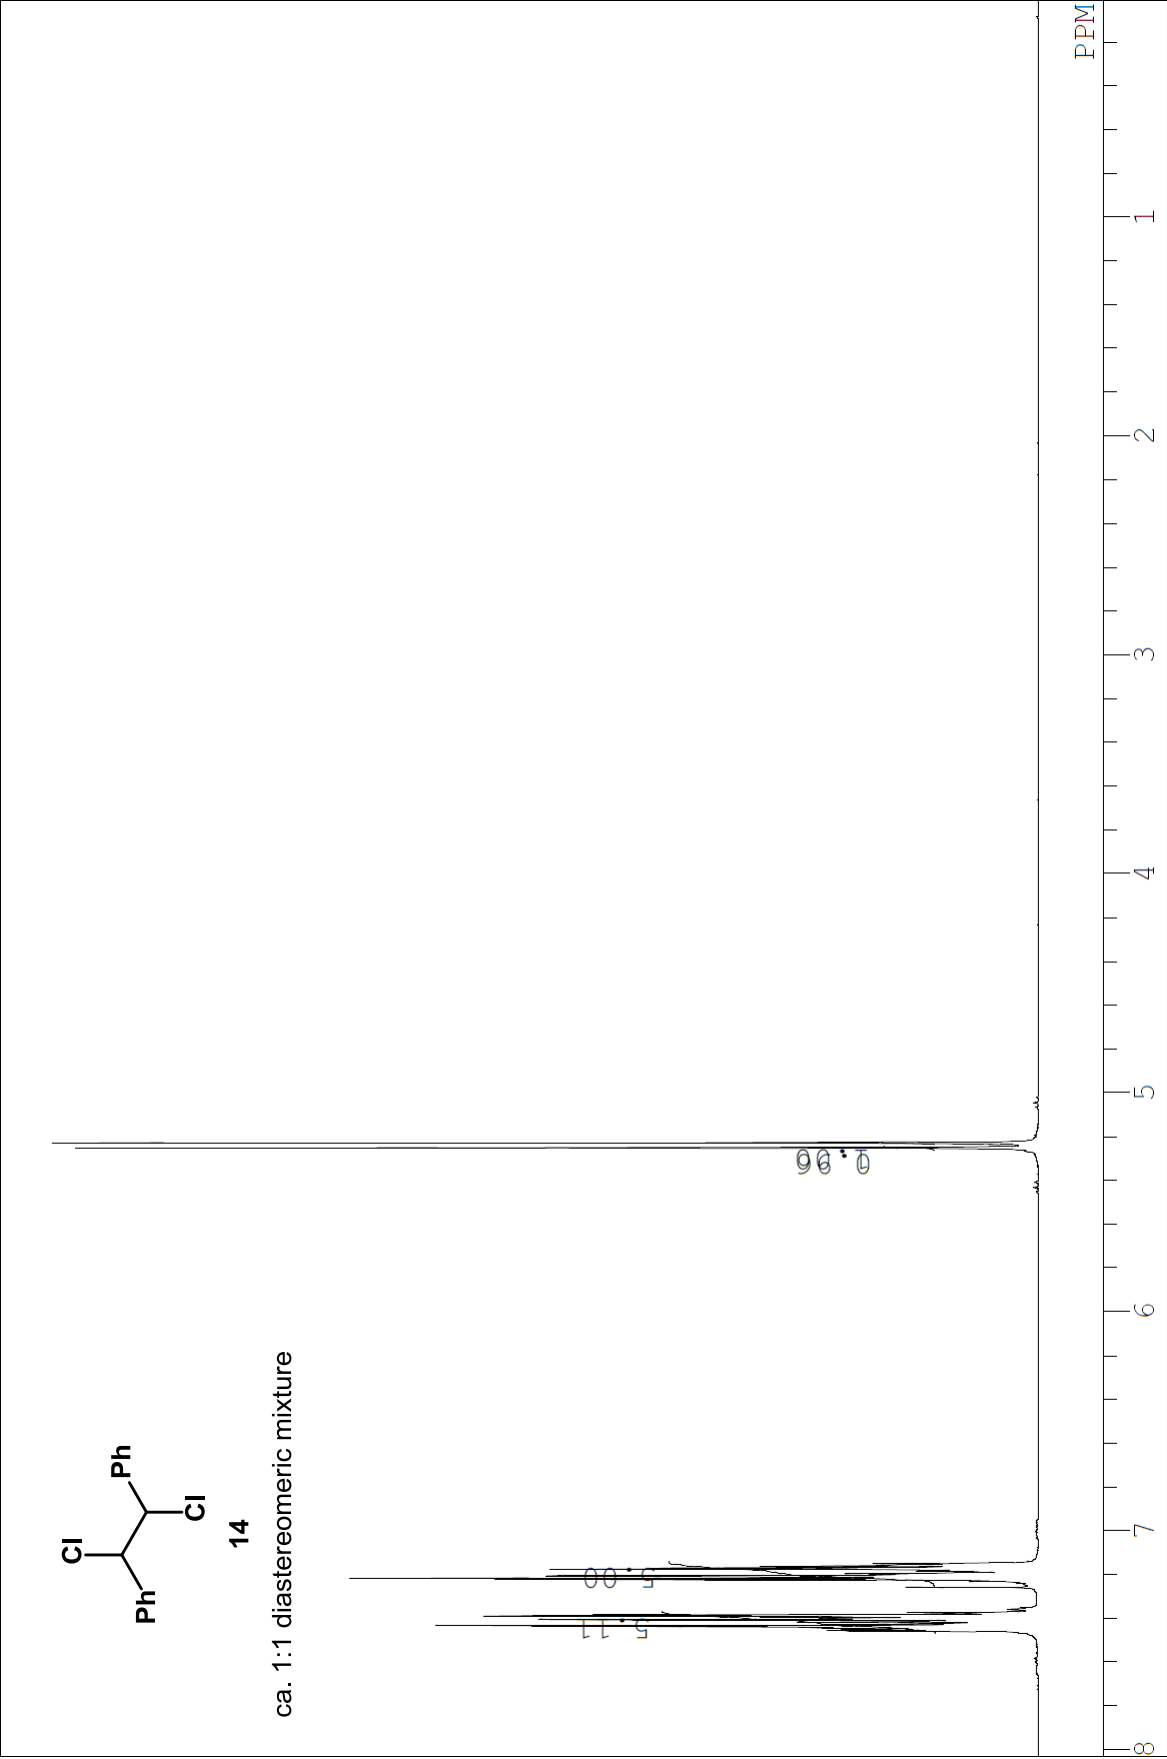

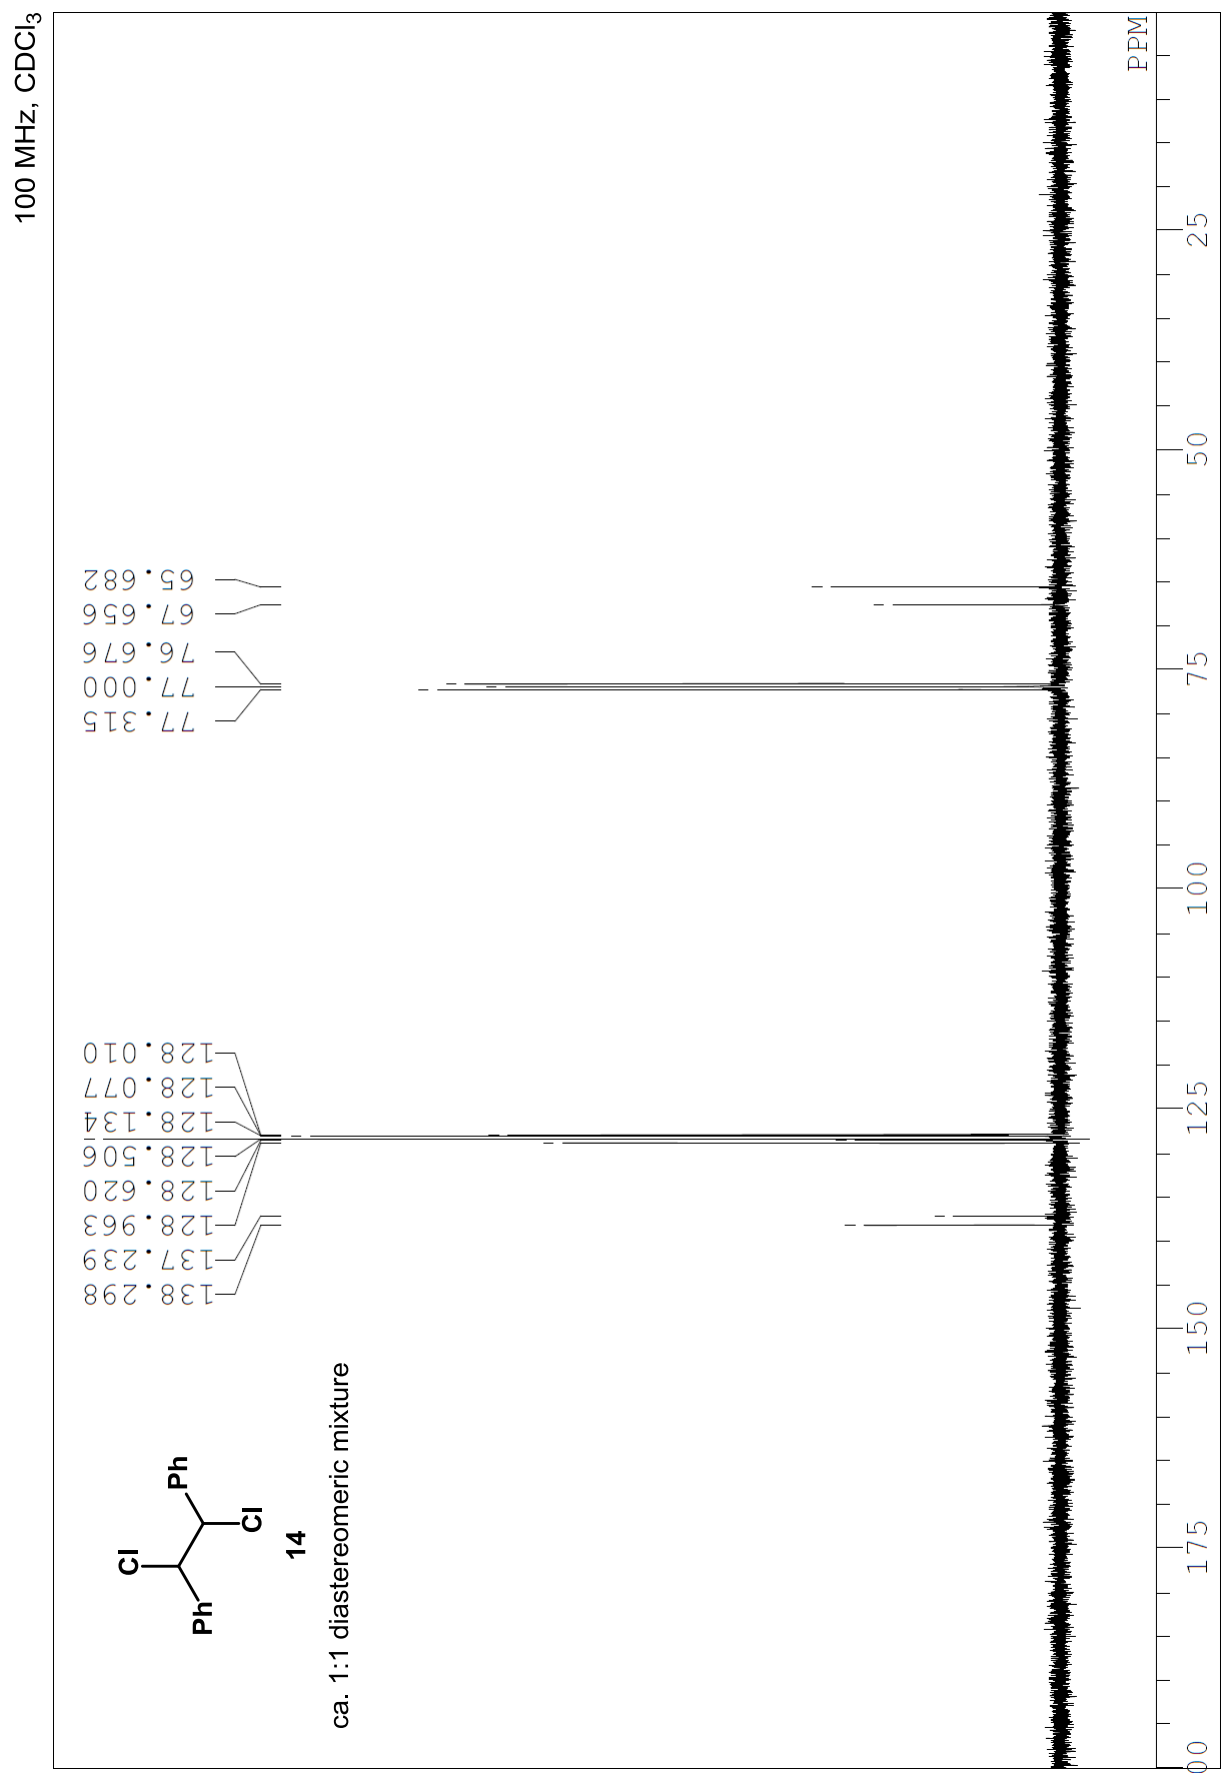

400 MHz, CDCl<sub>3</sub>

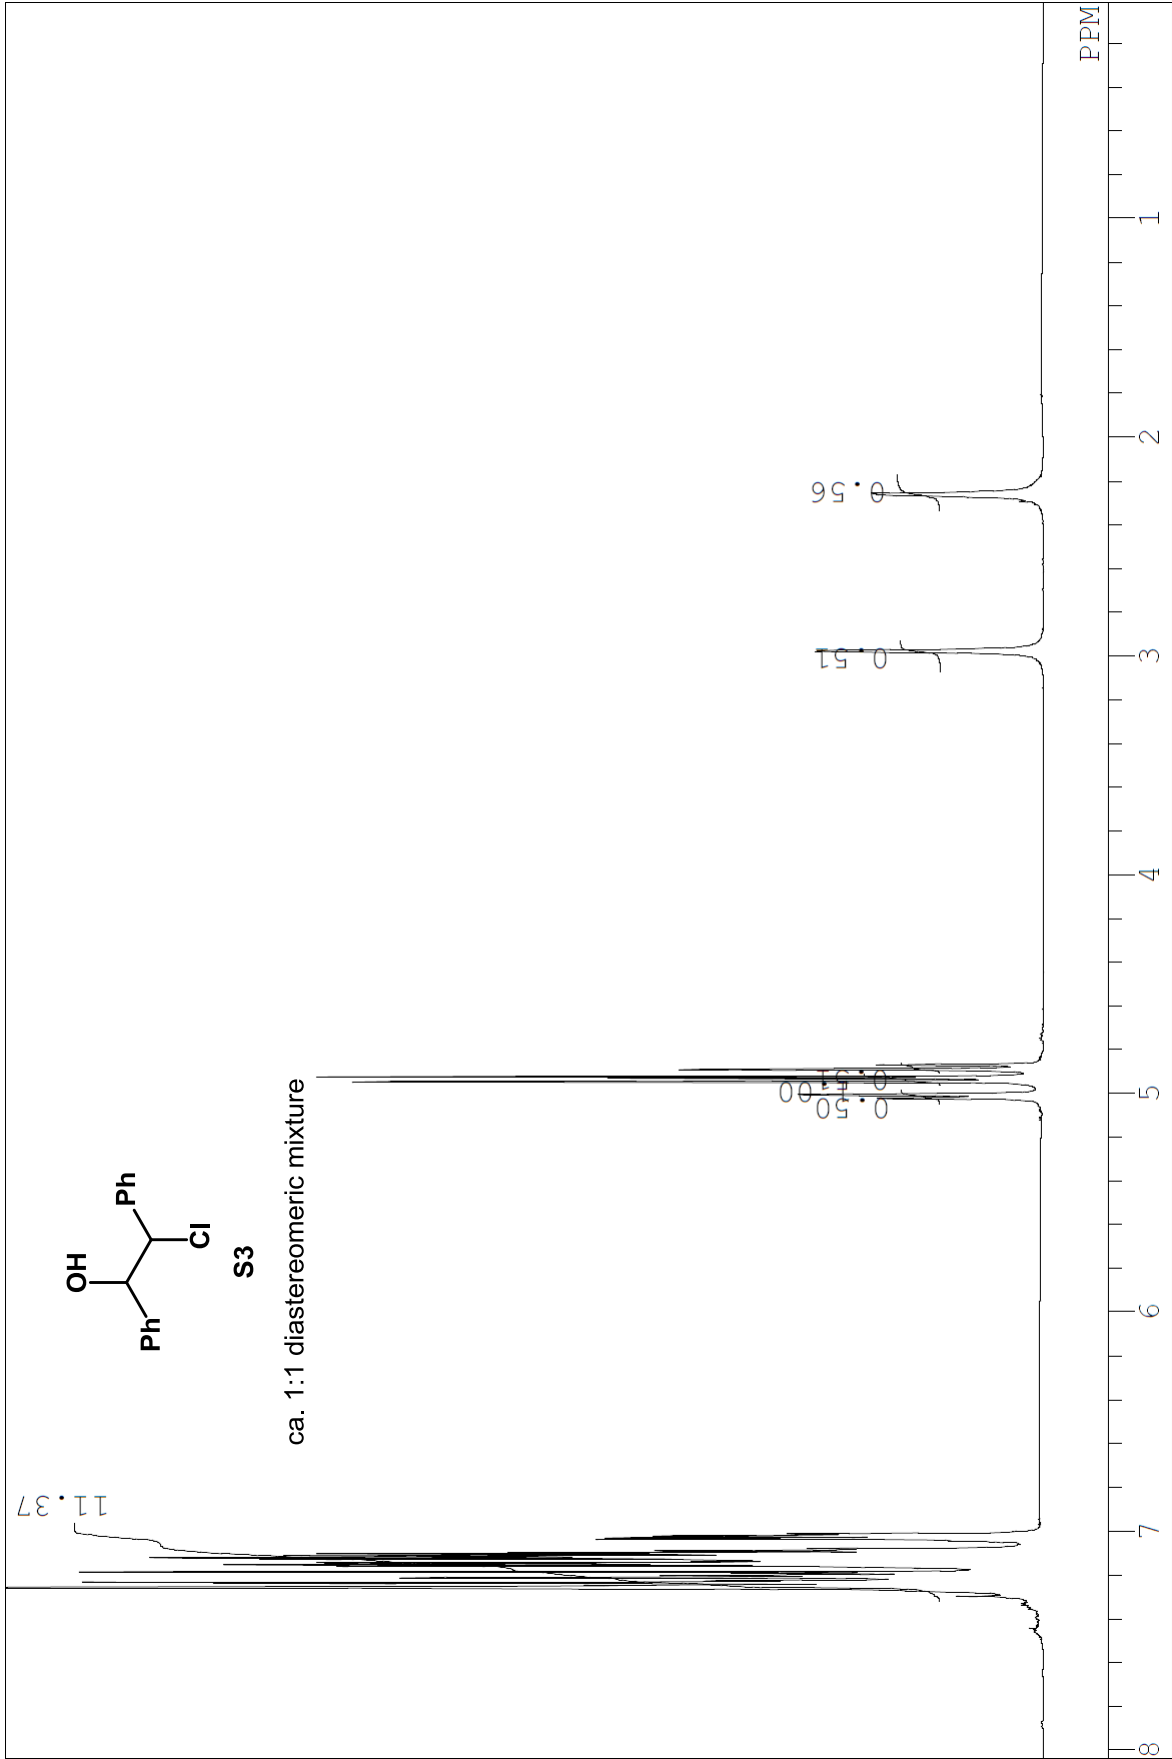

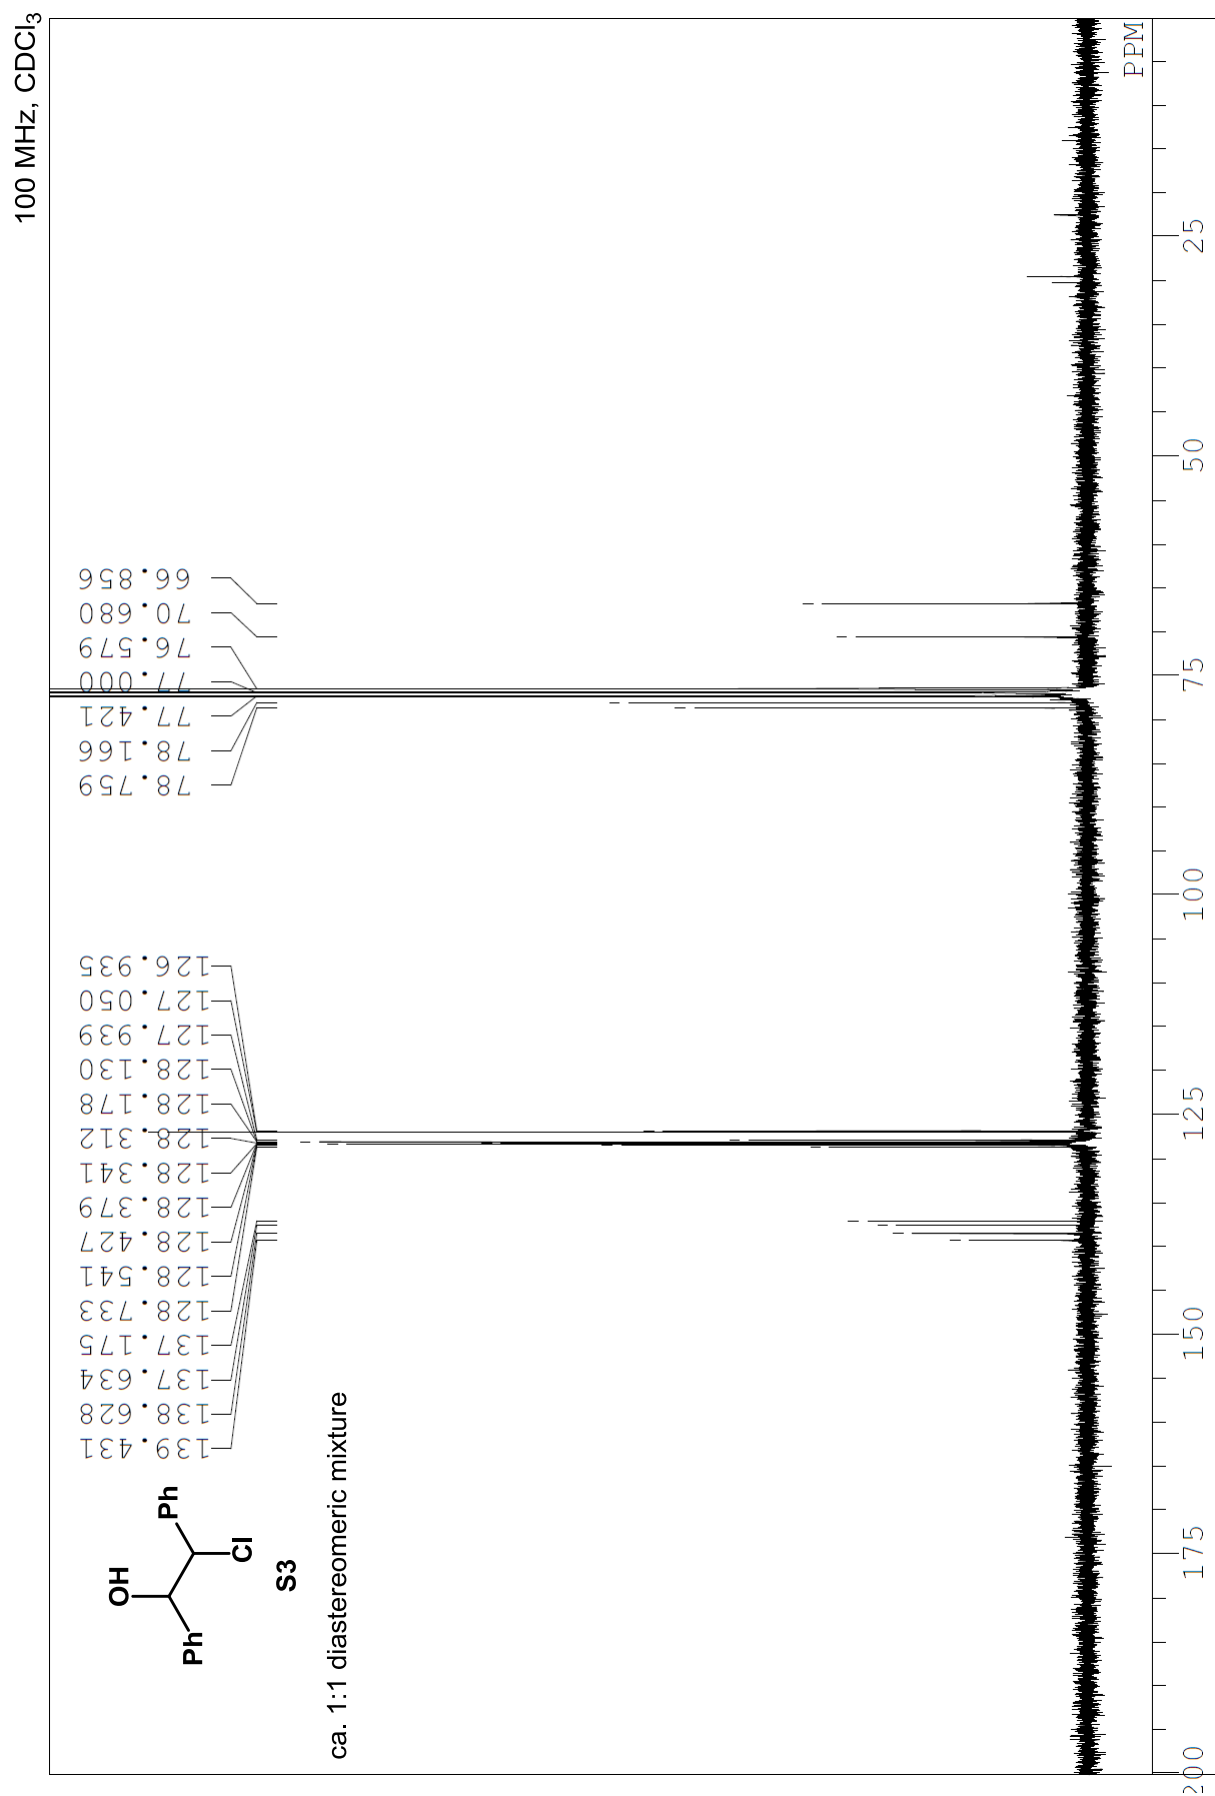



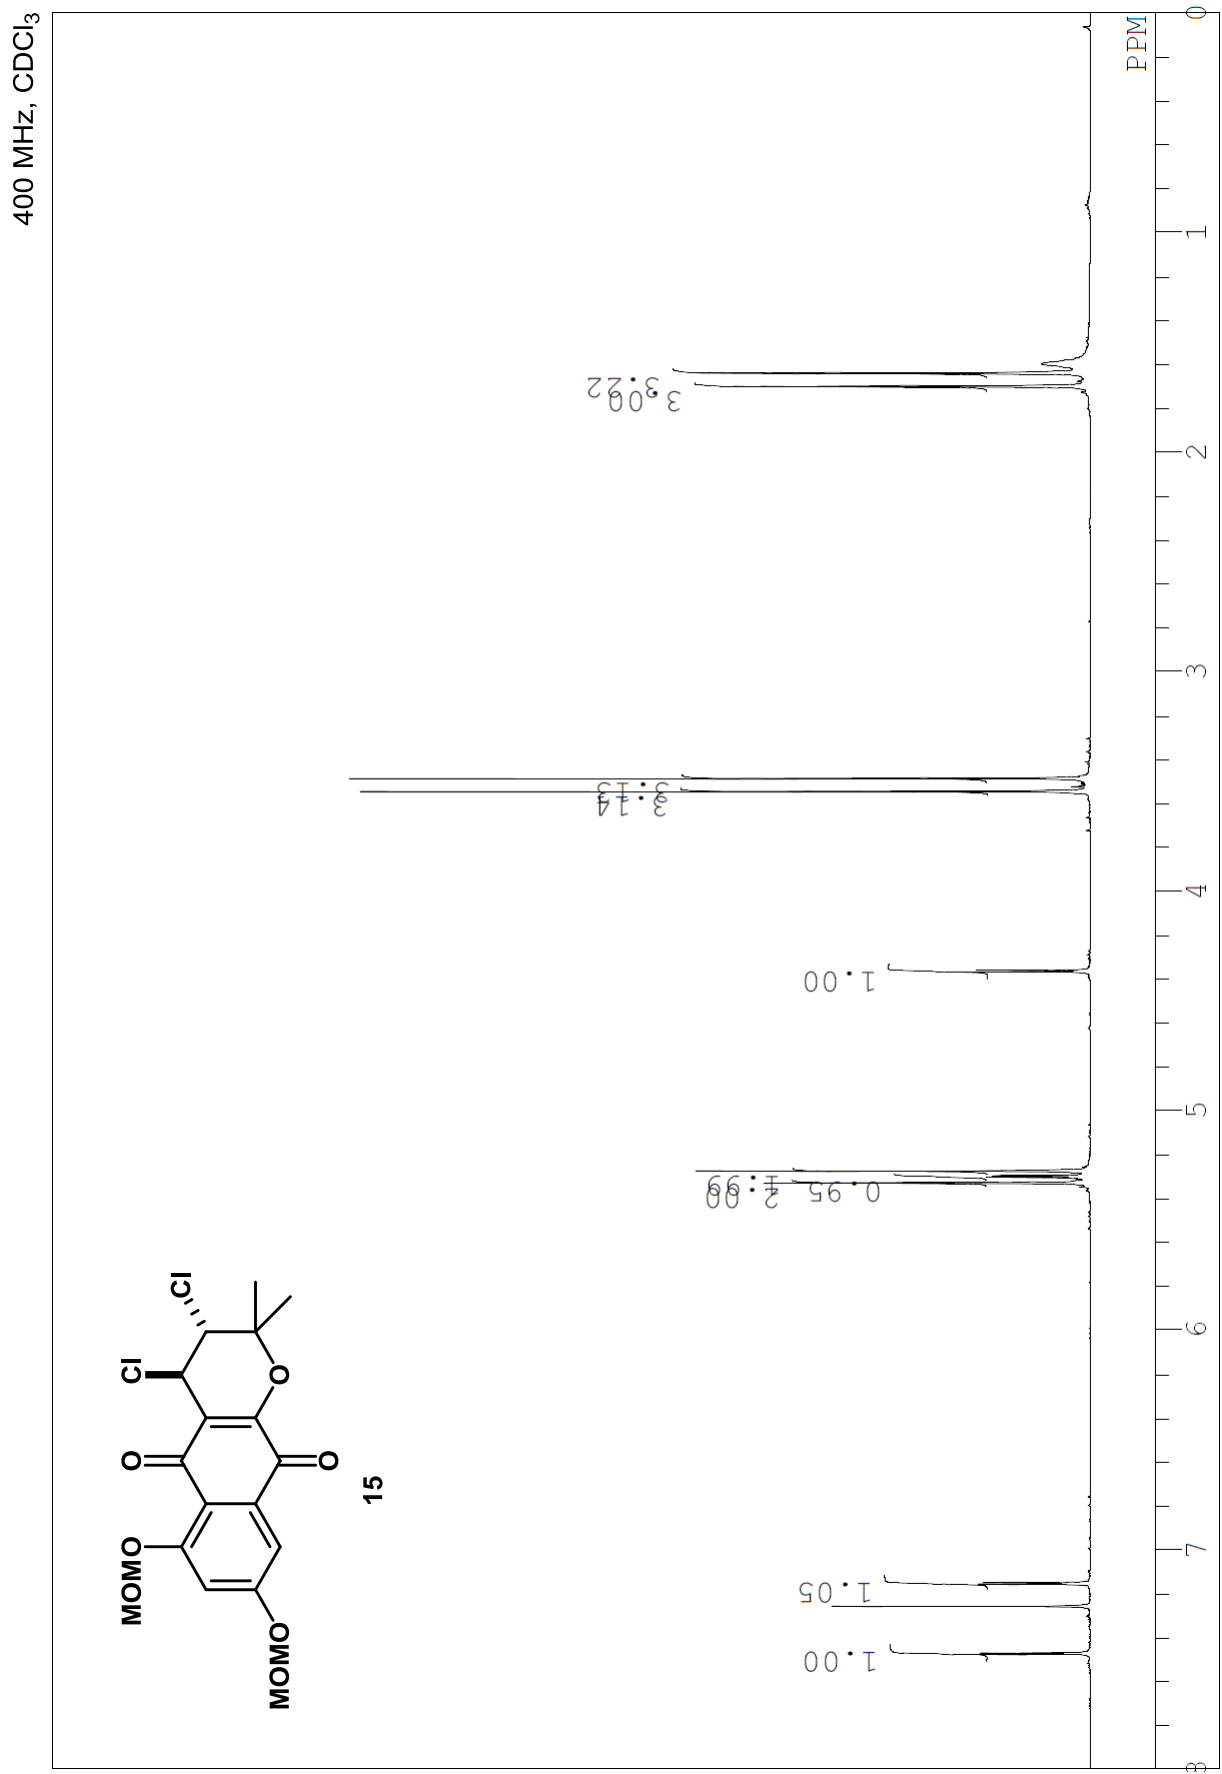

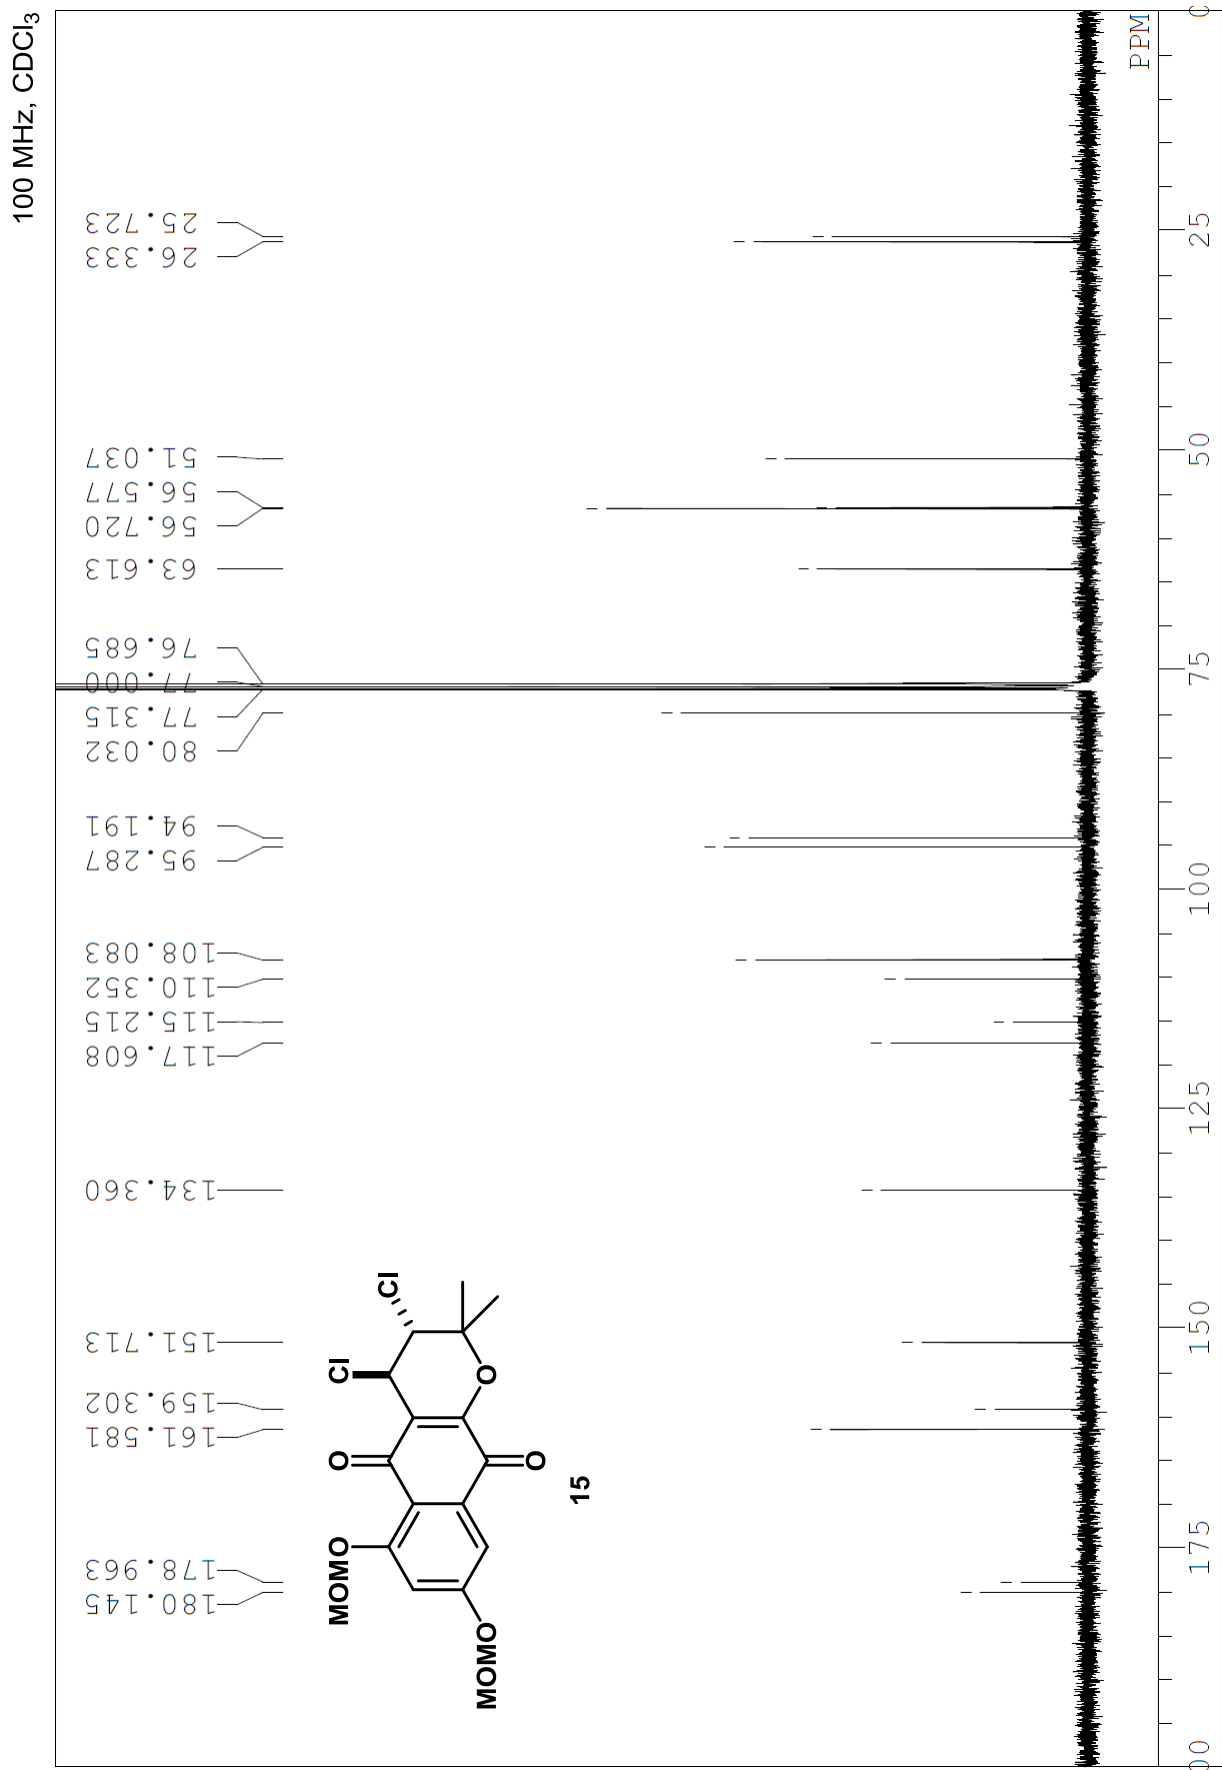

400 MHz, CDCl<sub>3</sub>

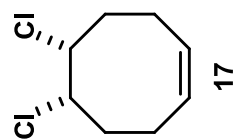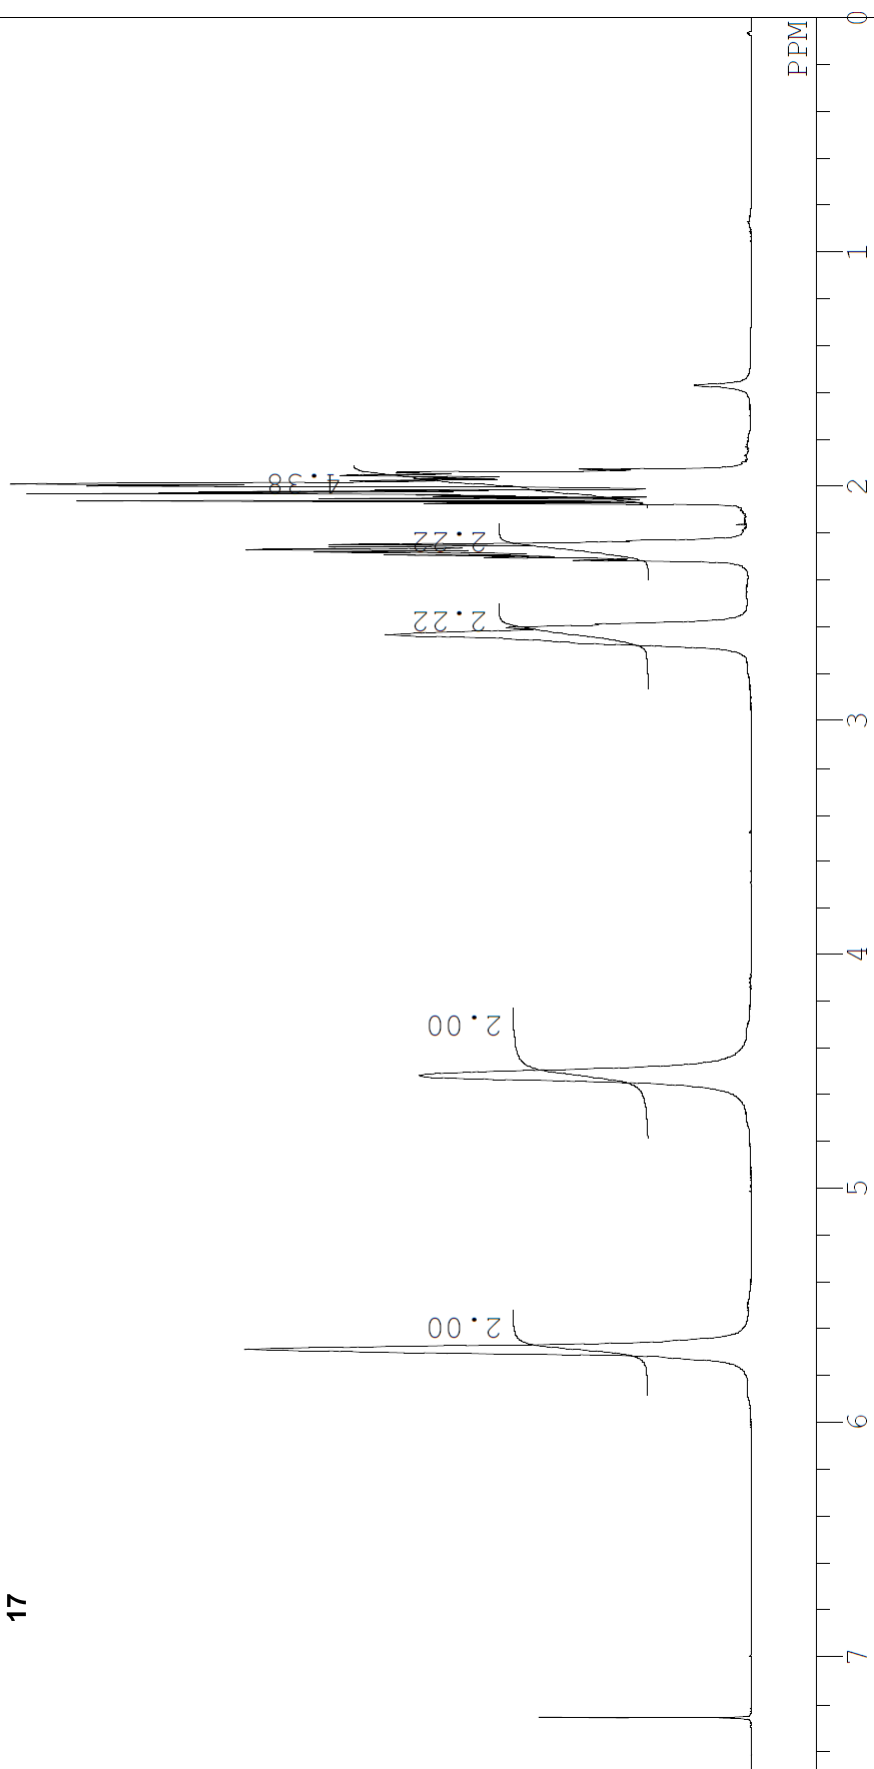

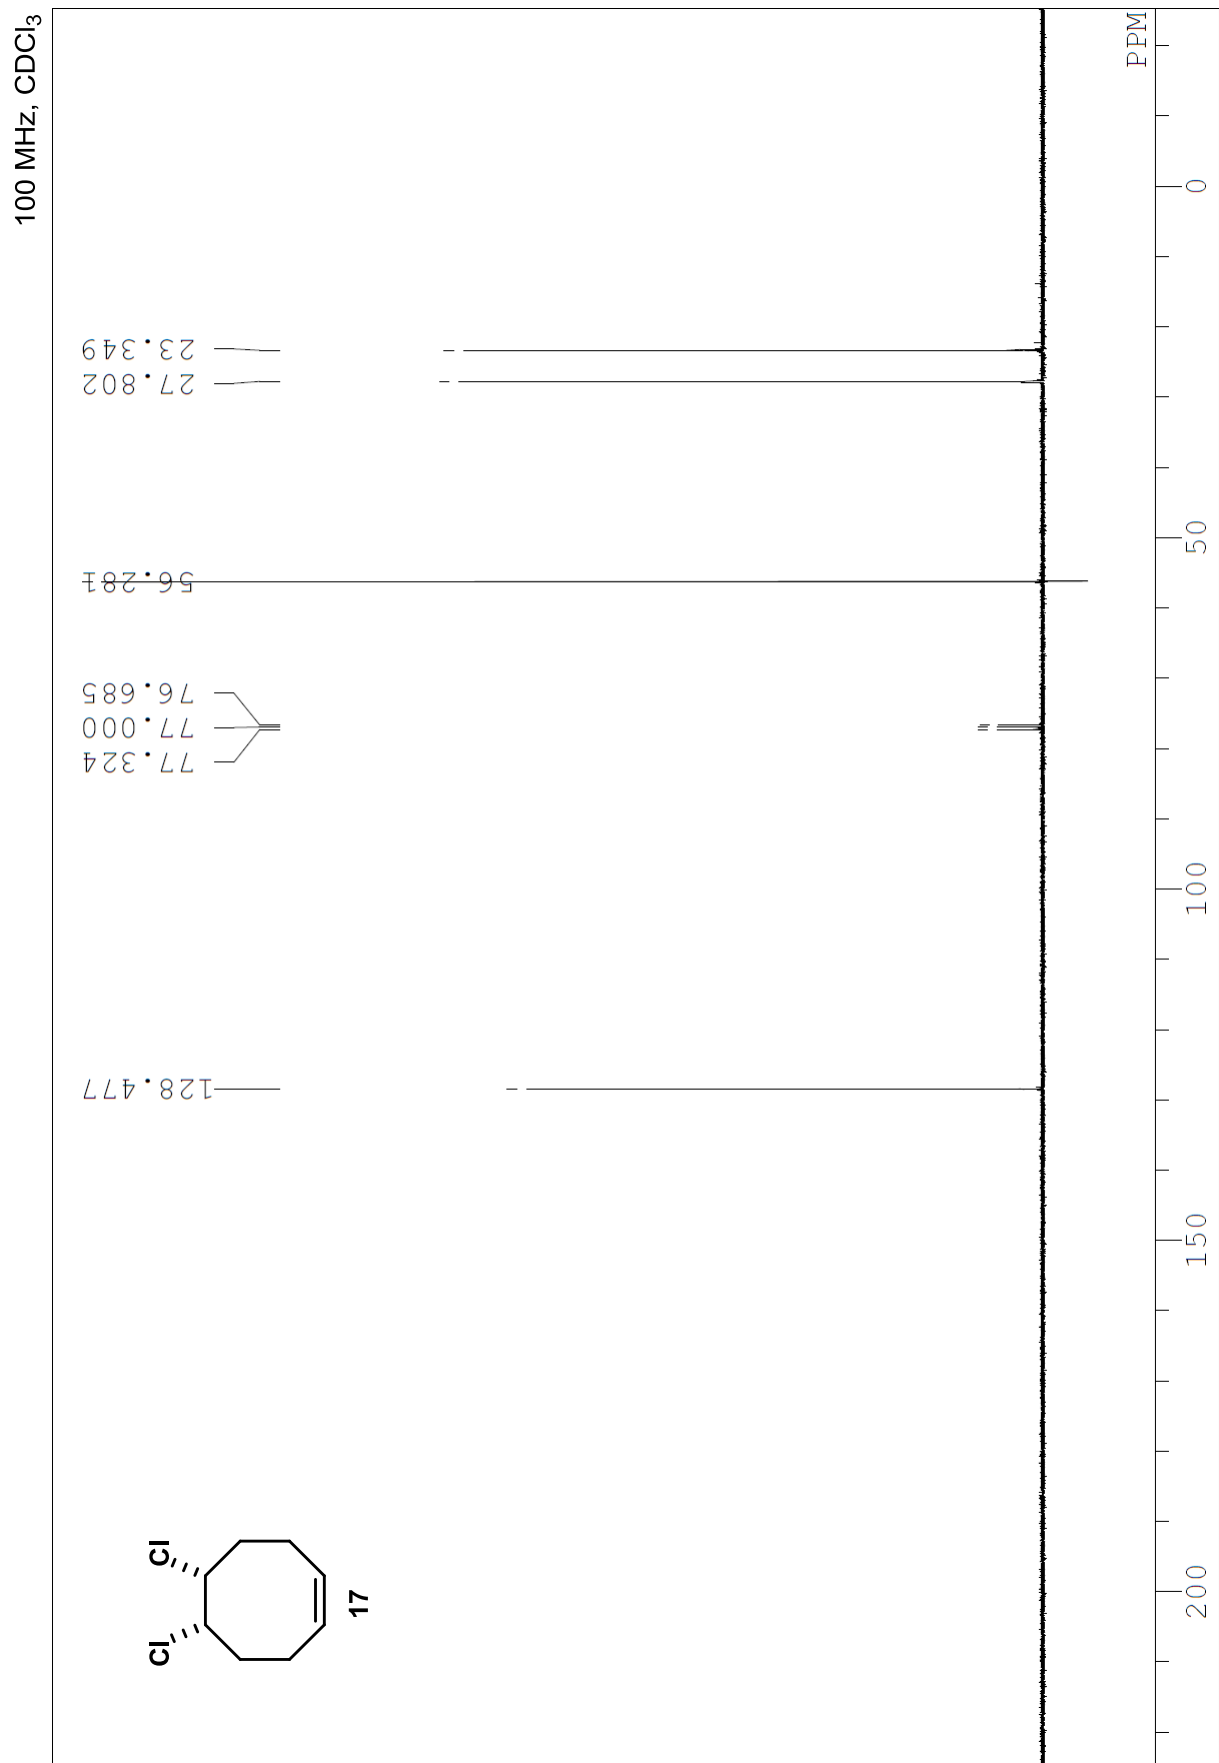

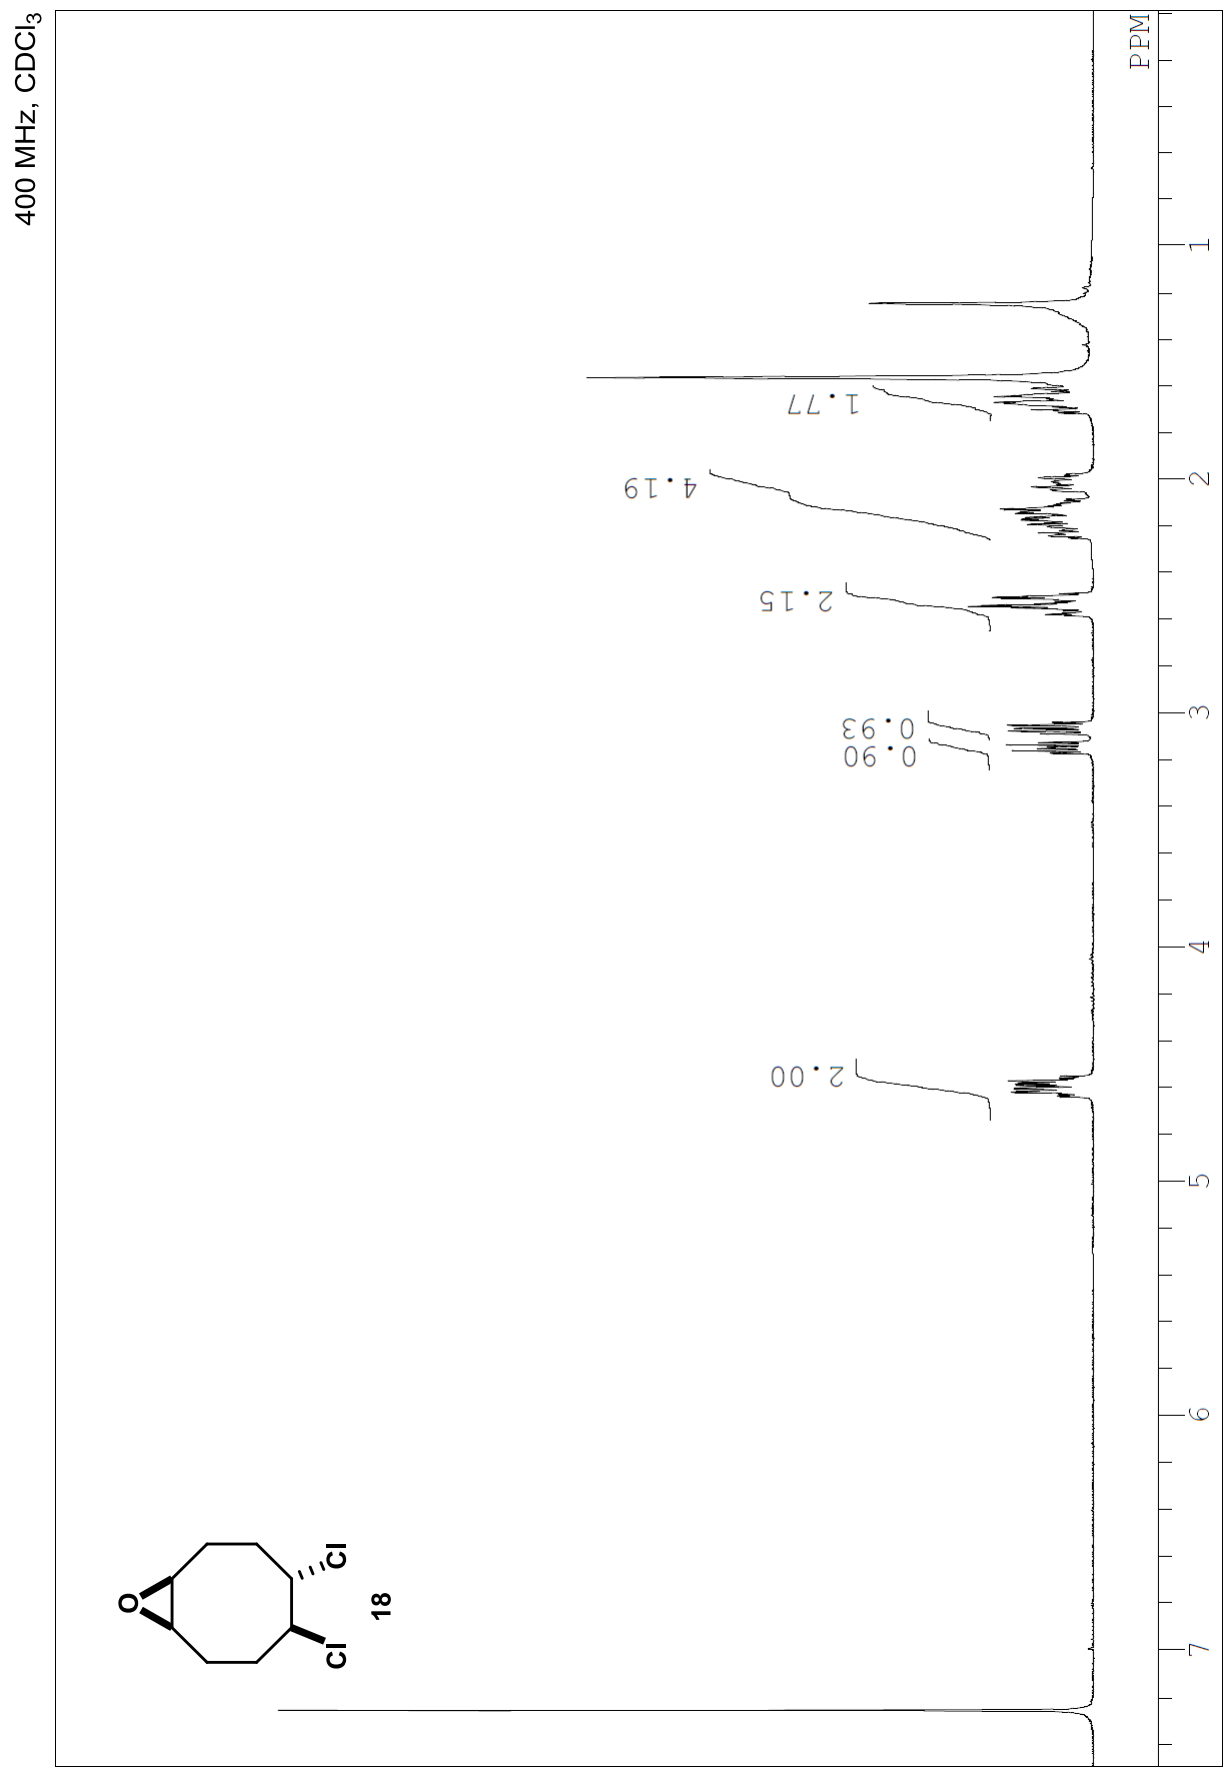

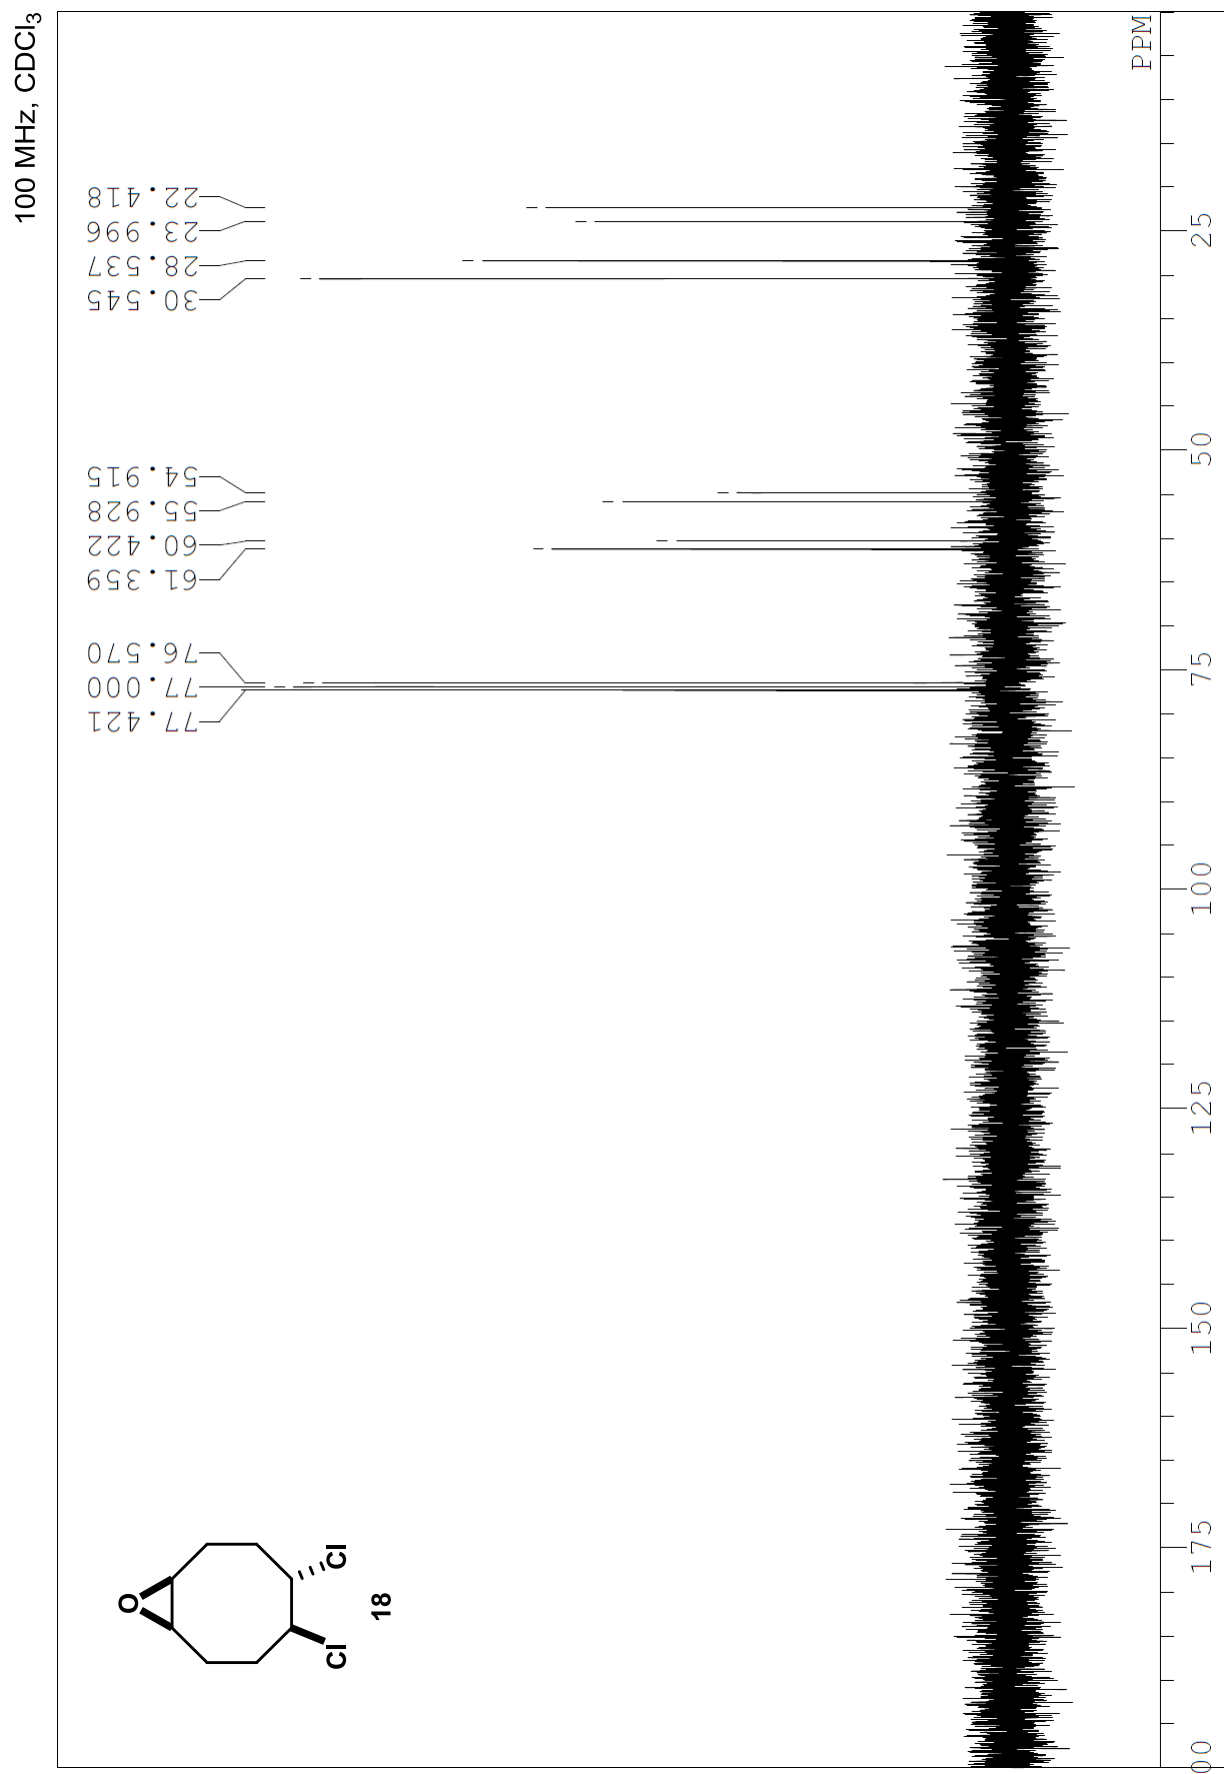

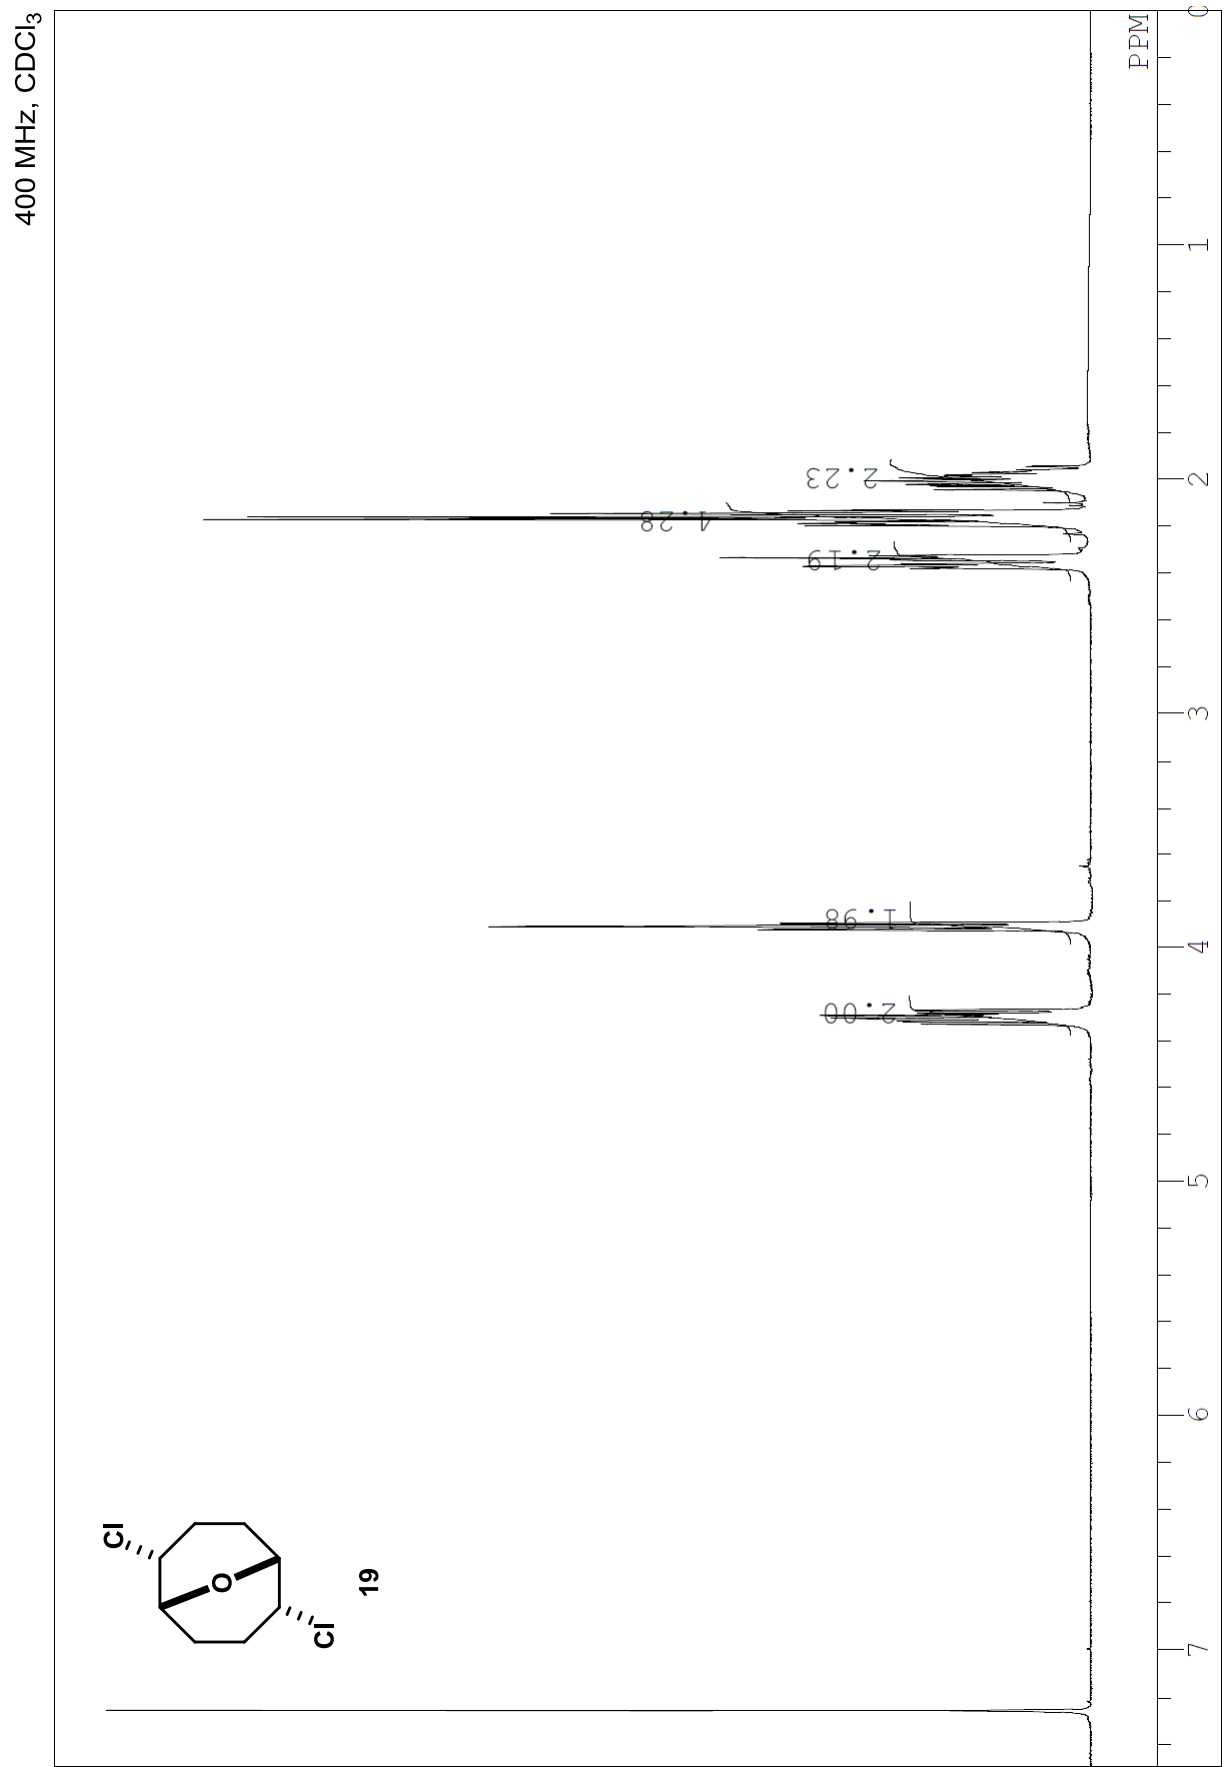

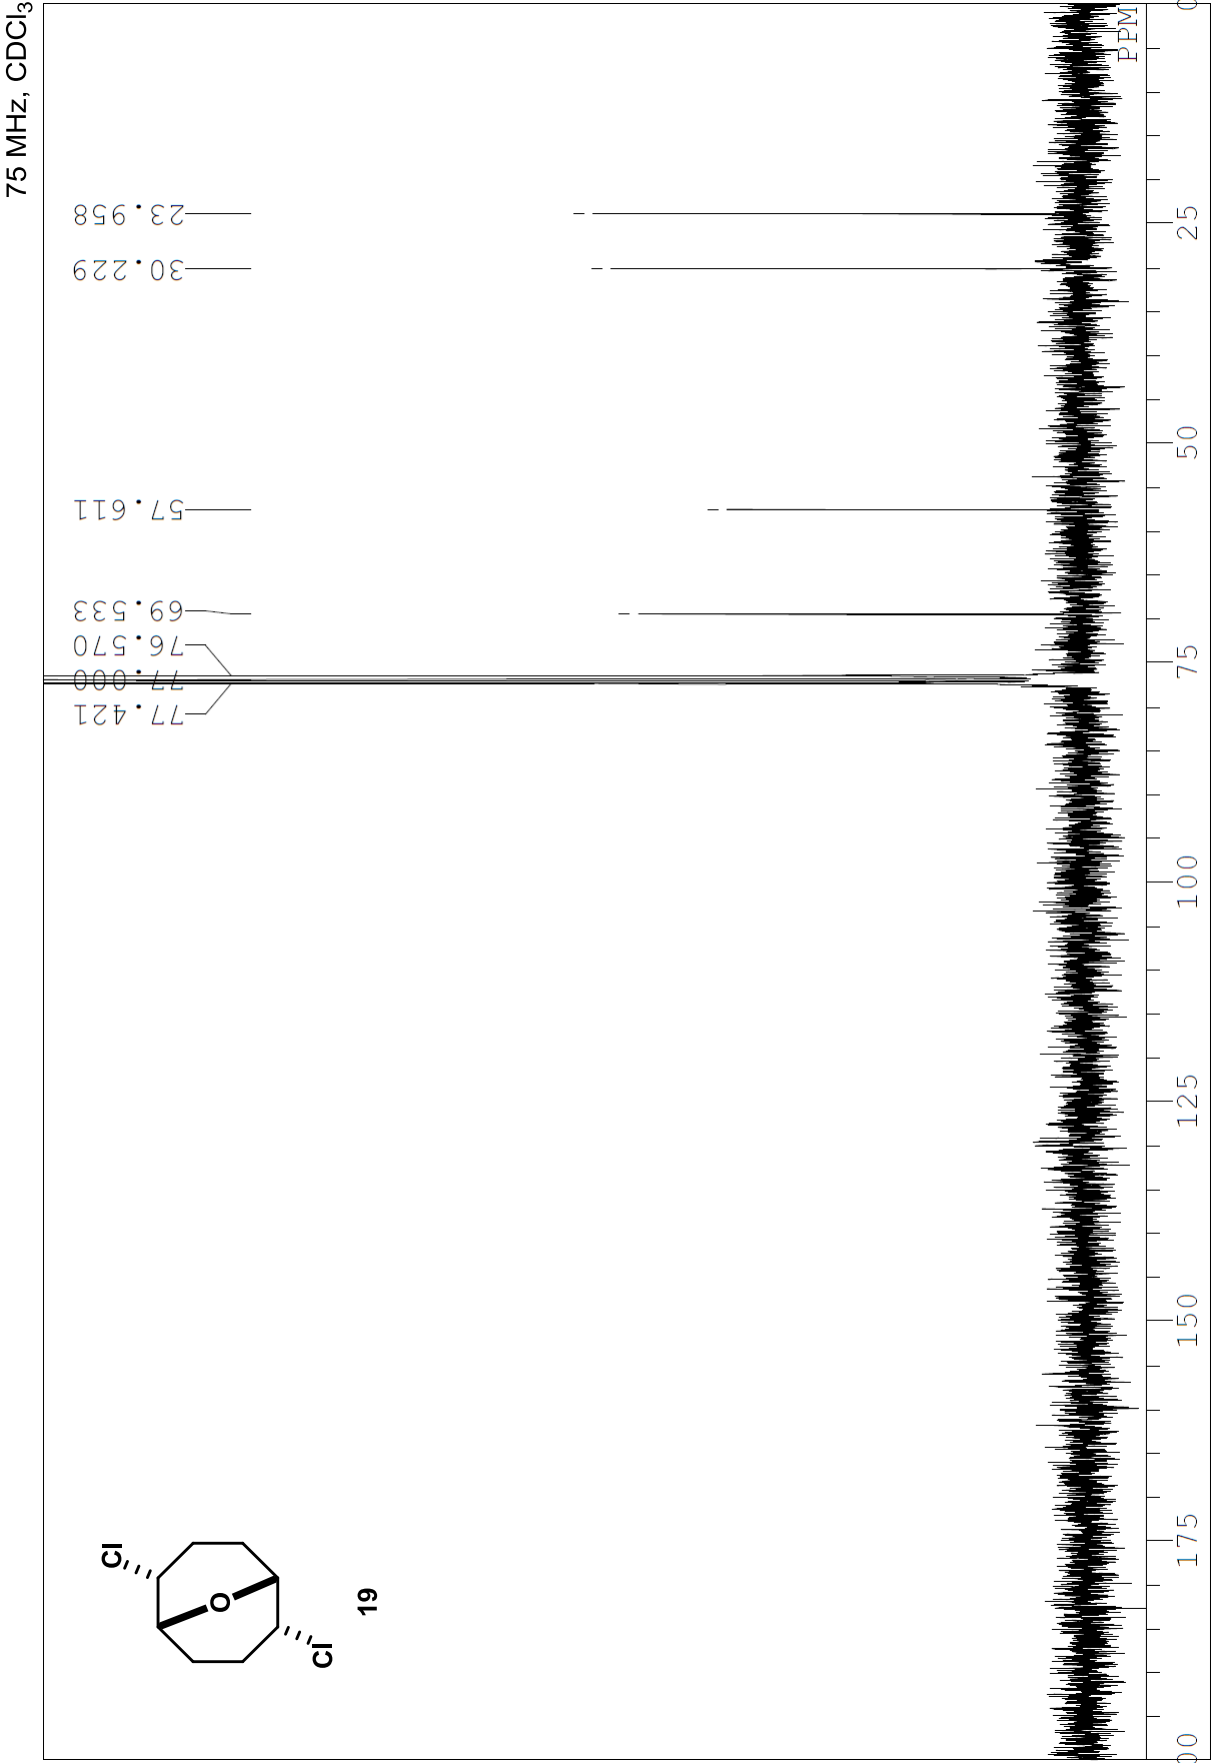



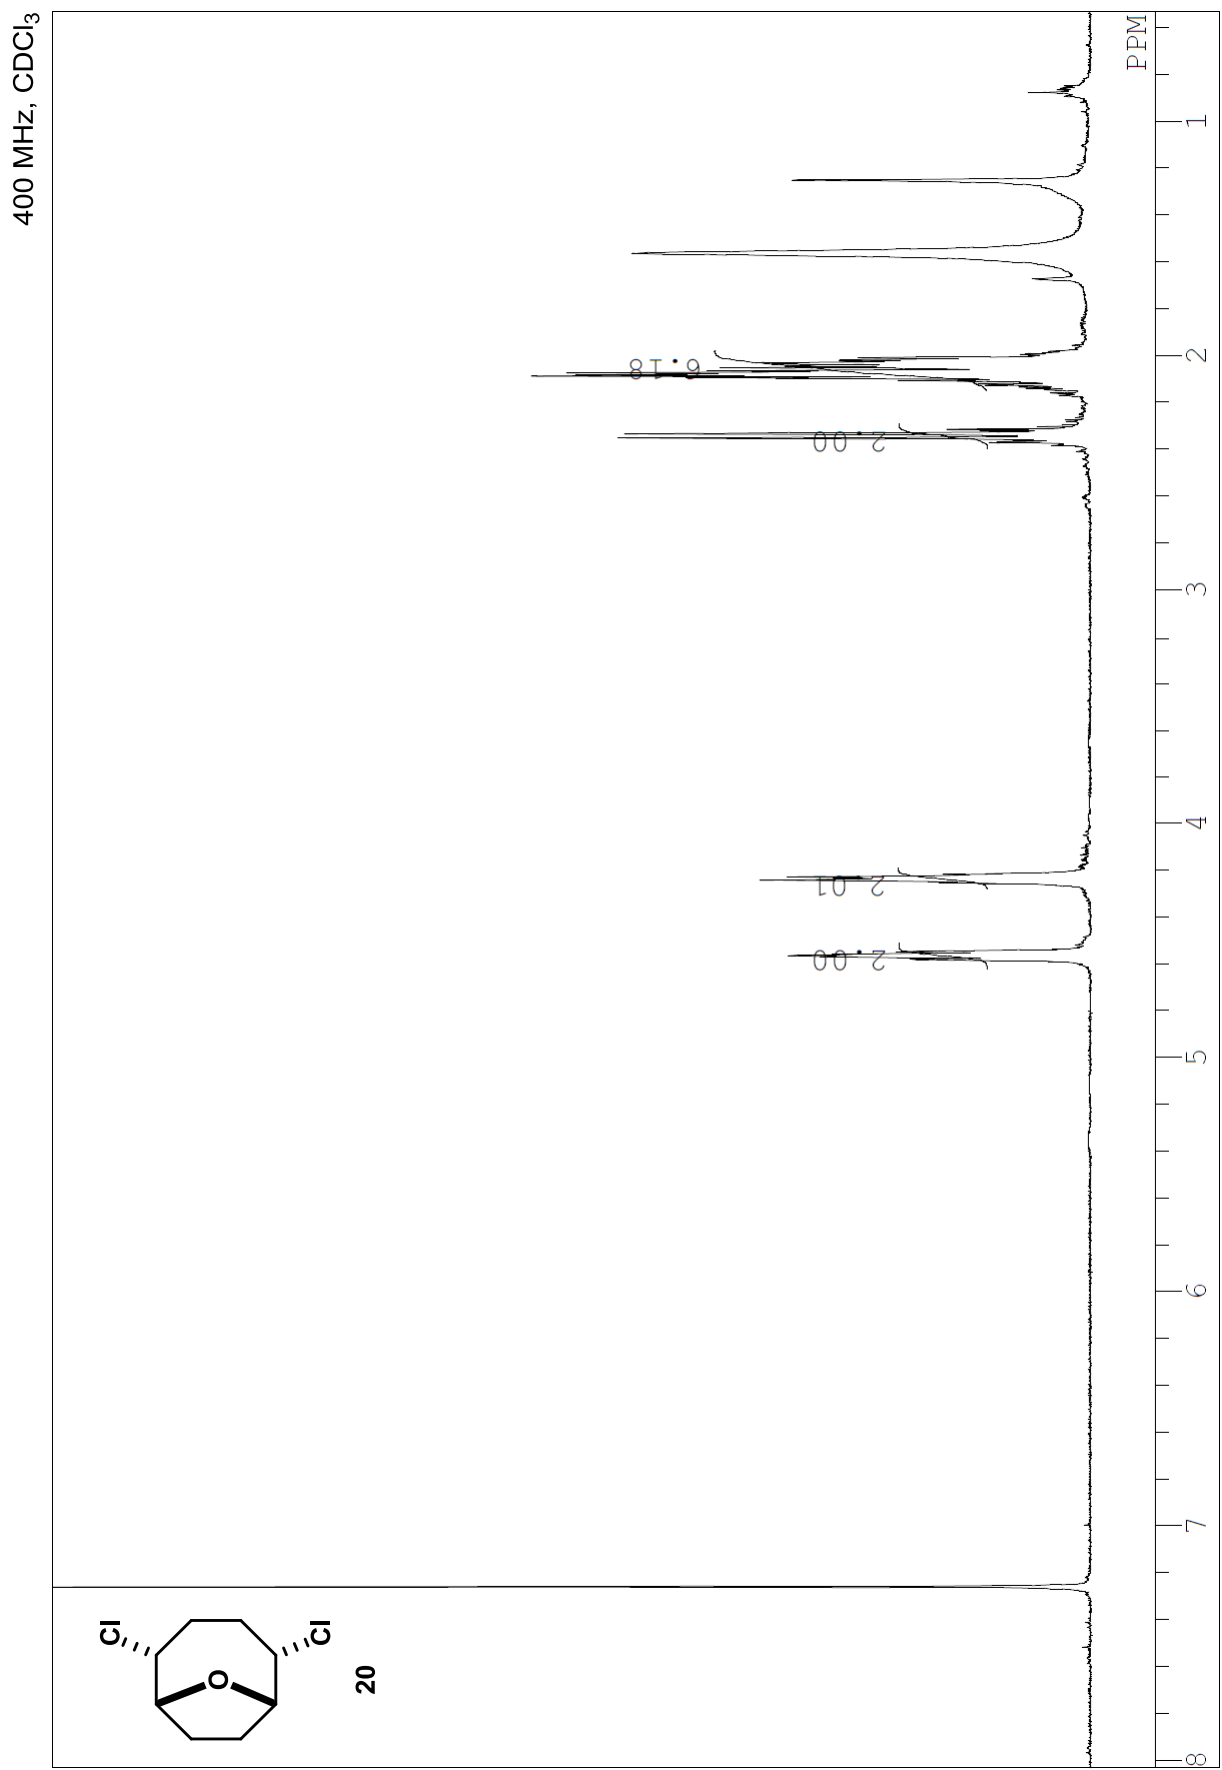

75 MHz, CDCl<sub>3</sub>

81.560  
77.421  
77.000  
76.579  
60.355  
30.813  
26.252

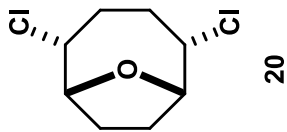

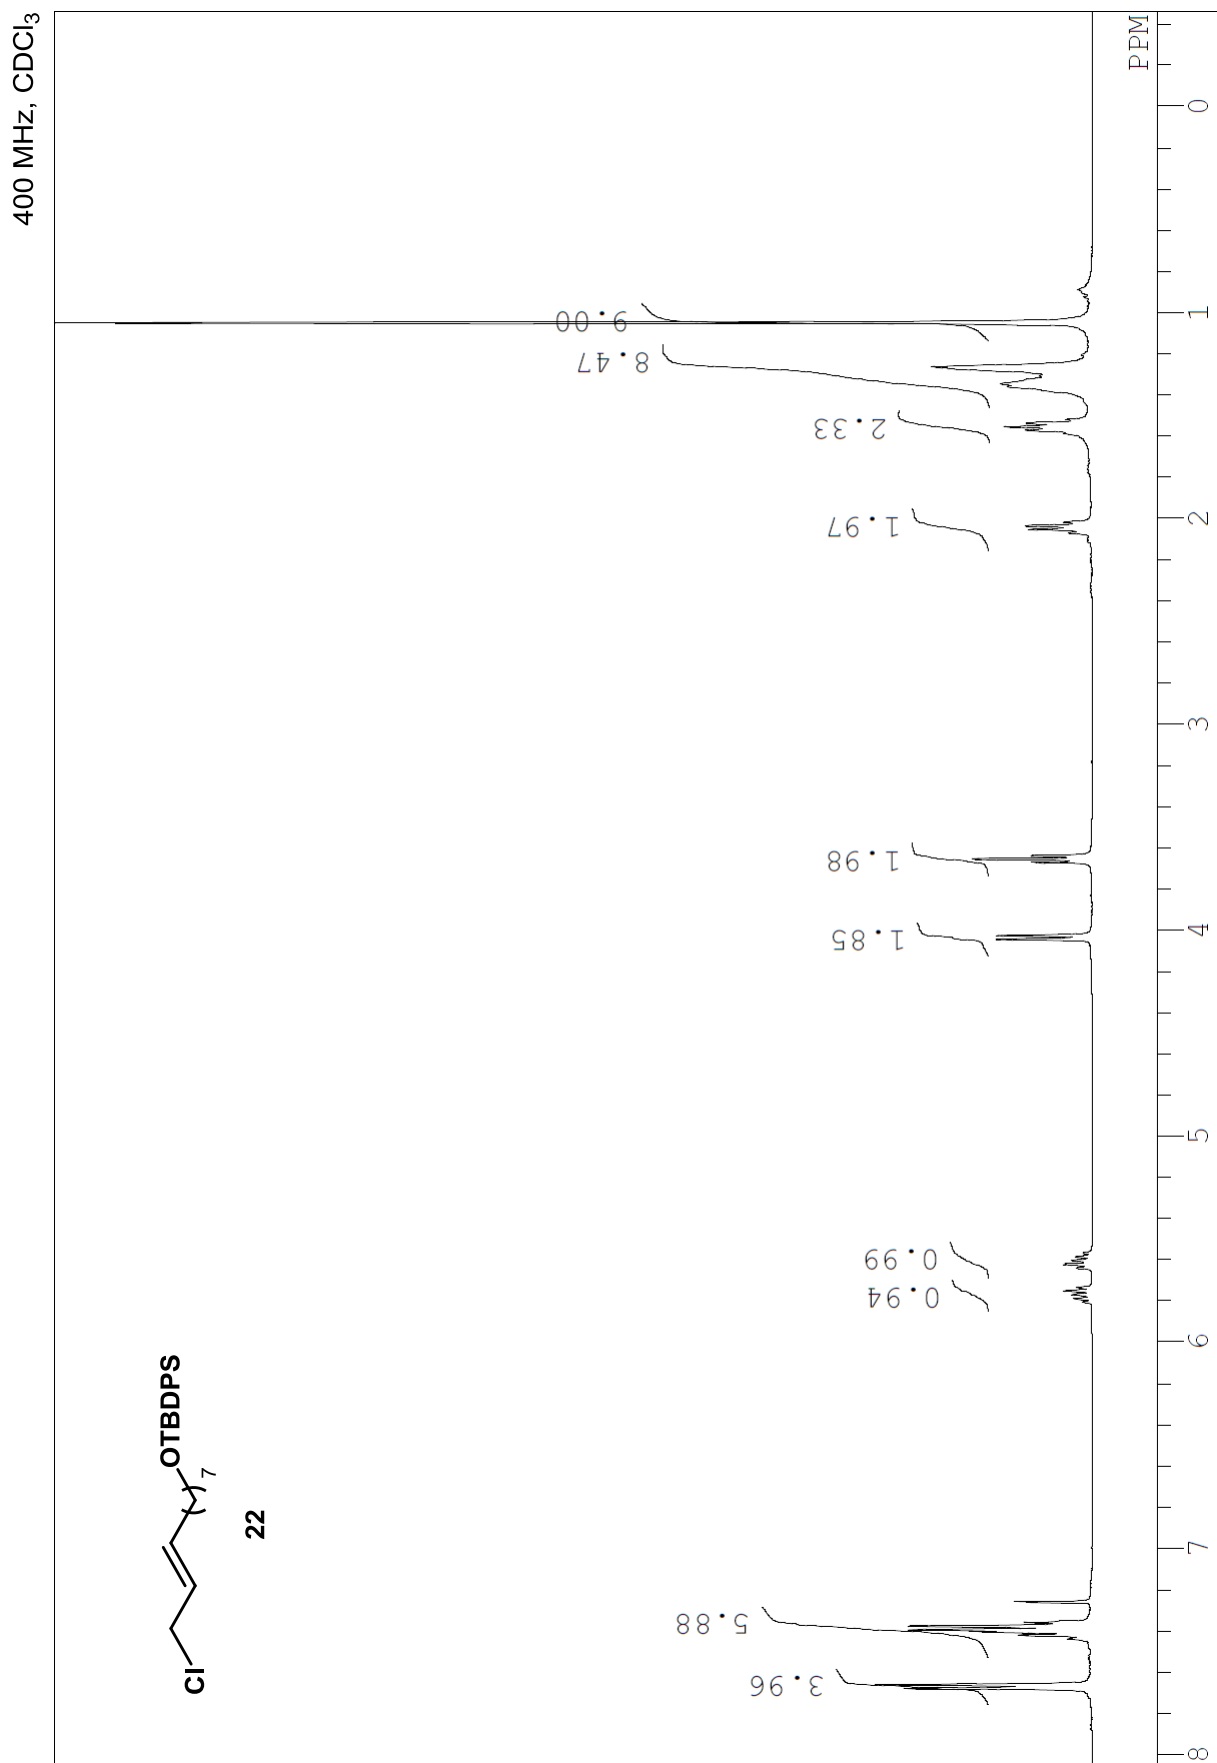

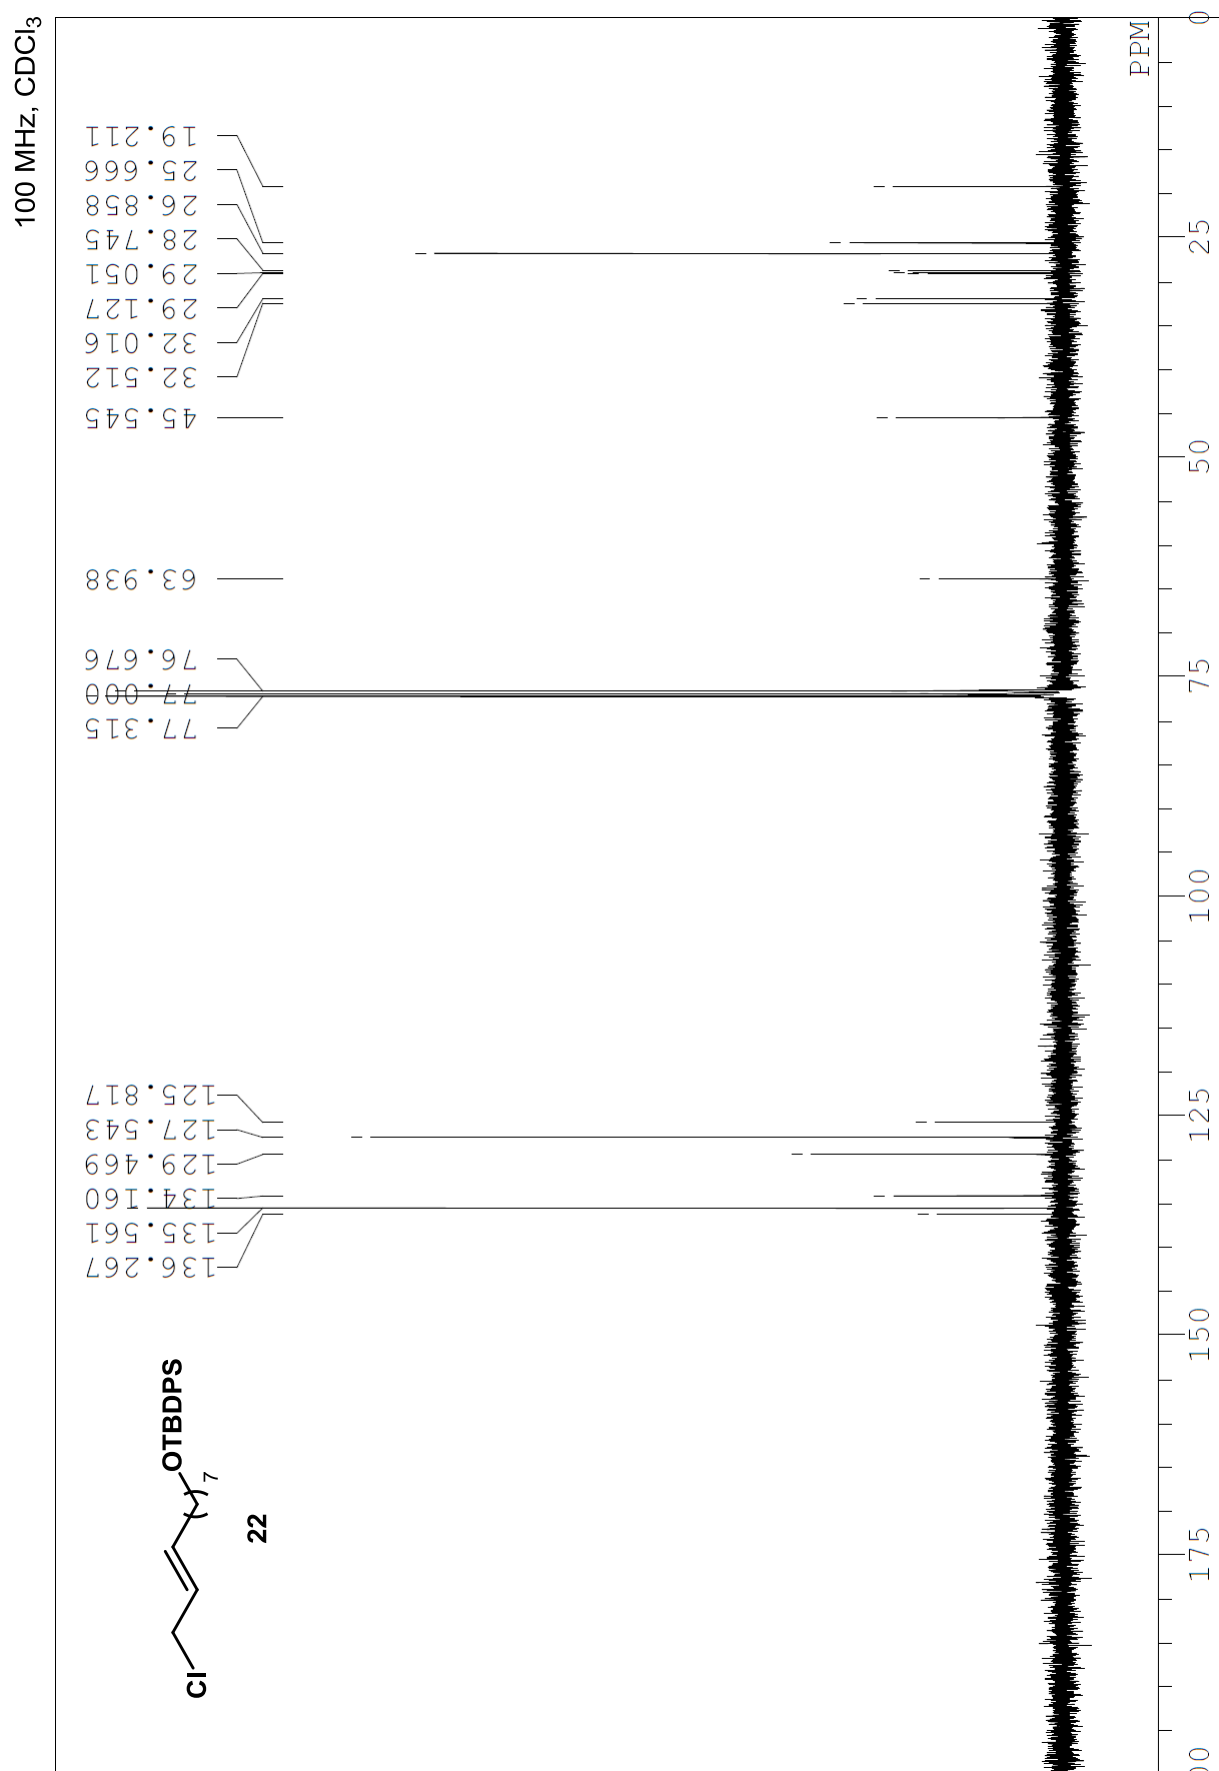

400 MHz, CDCl<sub>3</sub>

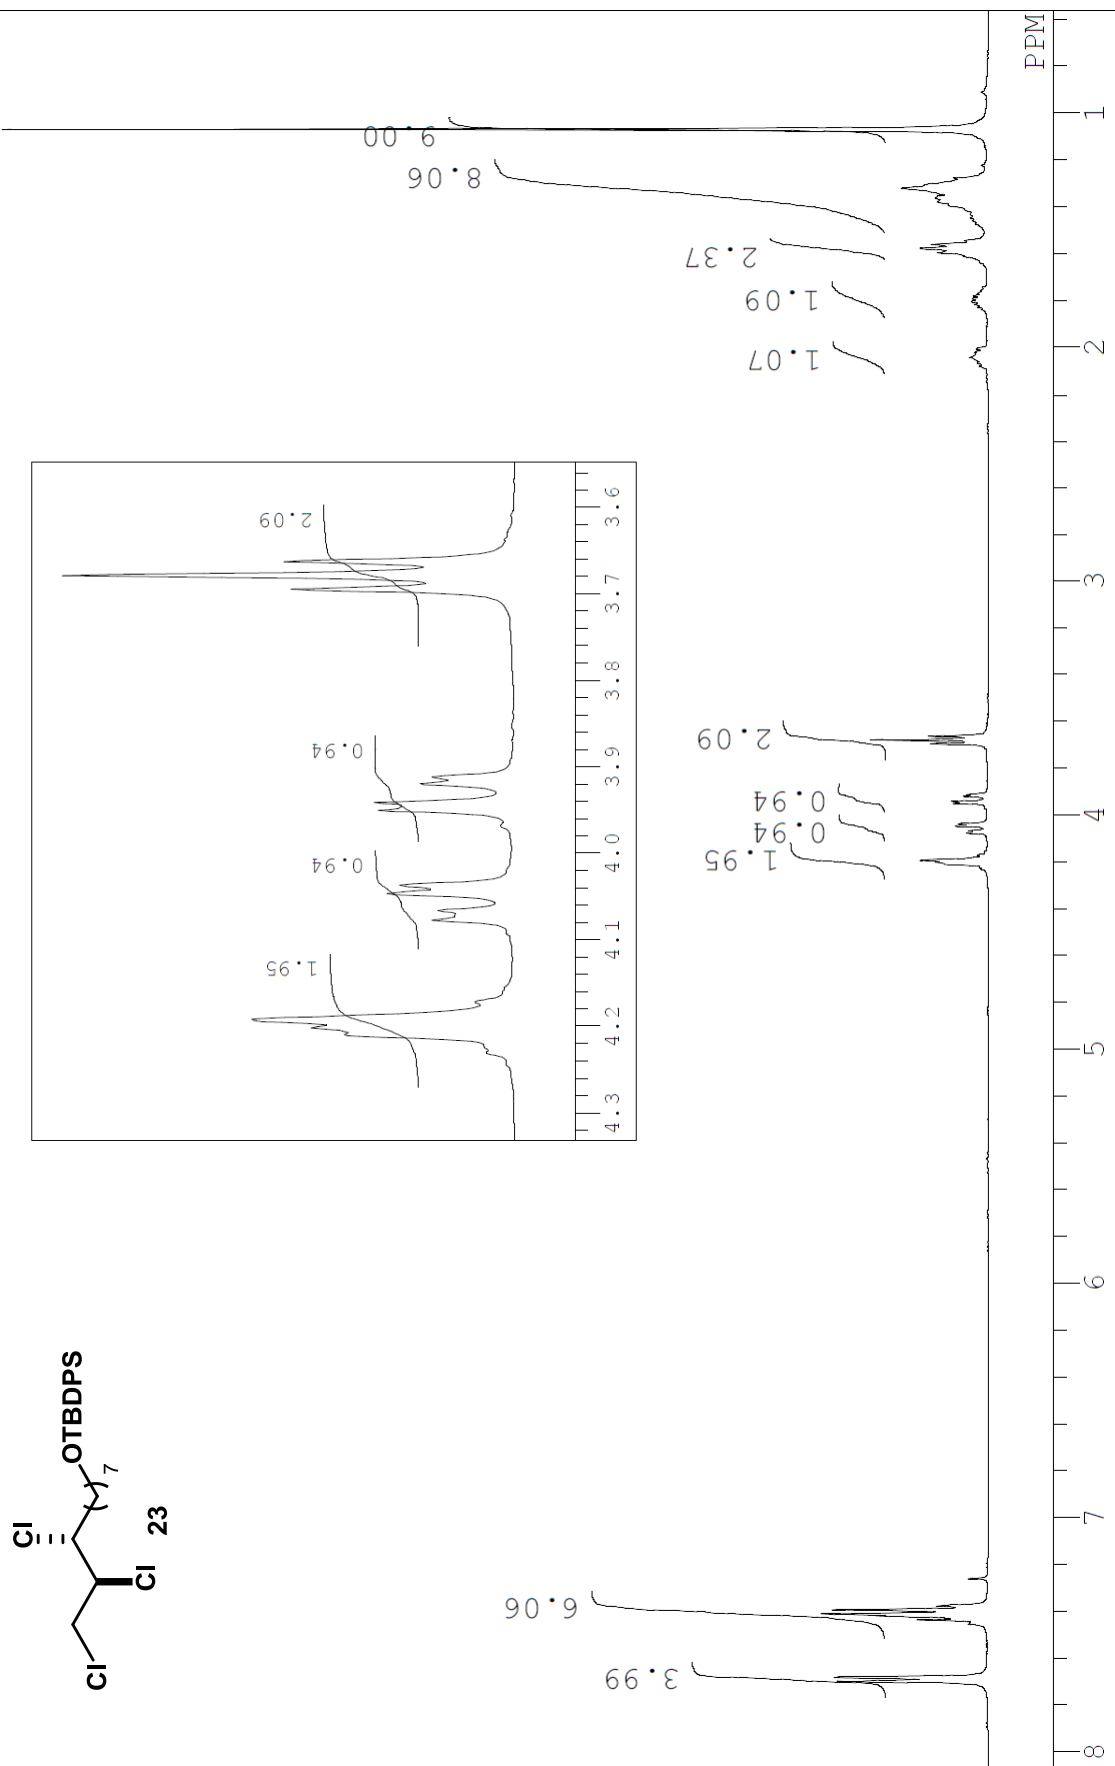

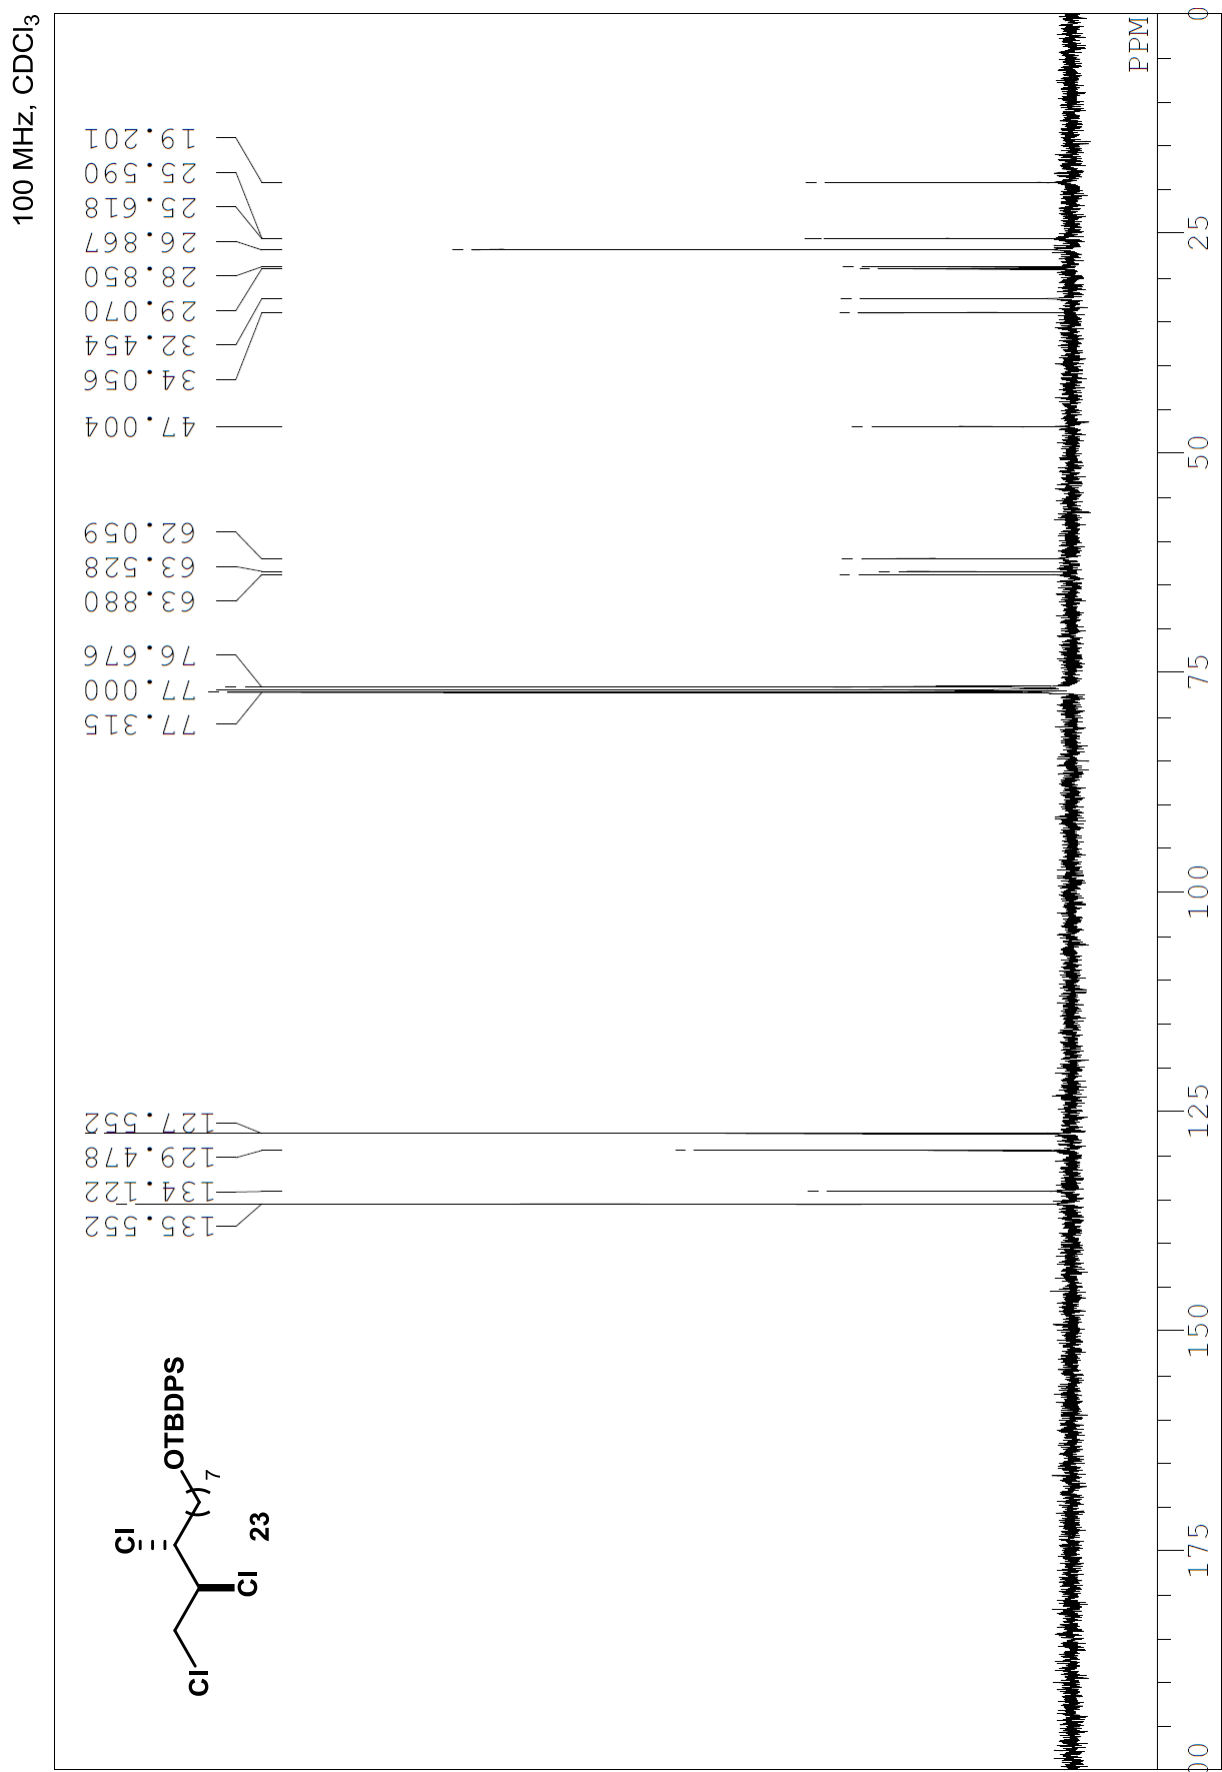

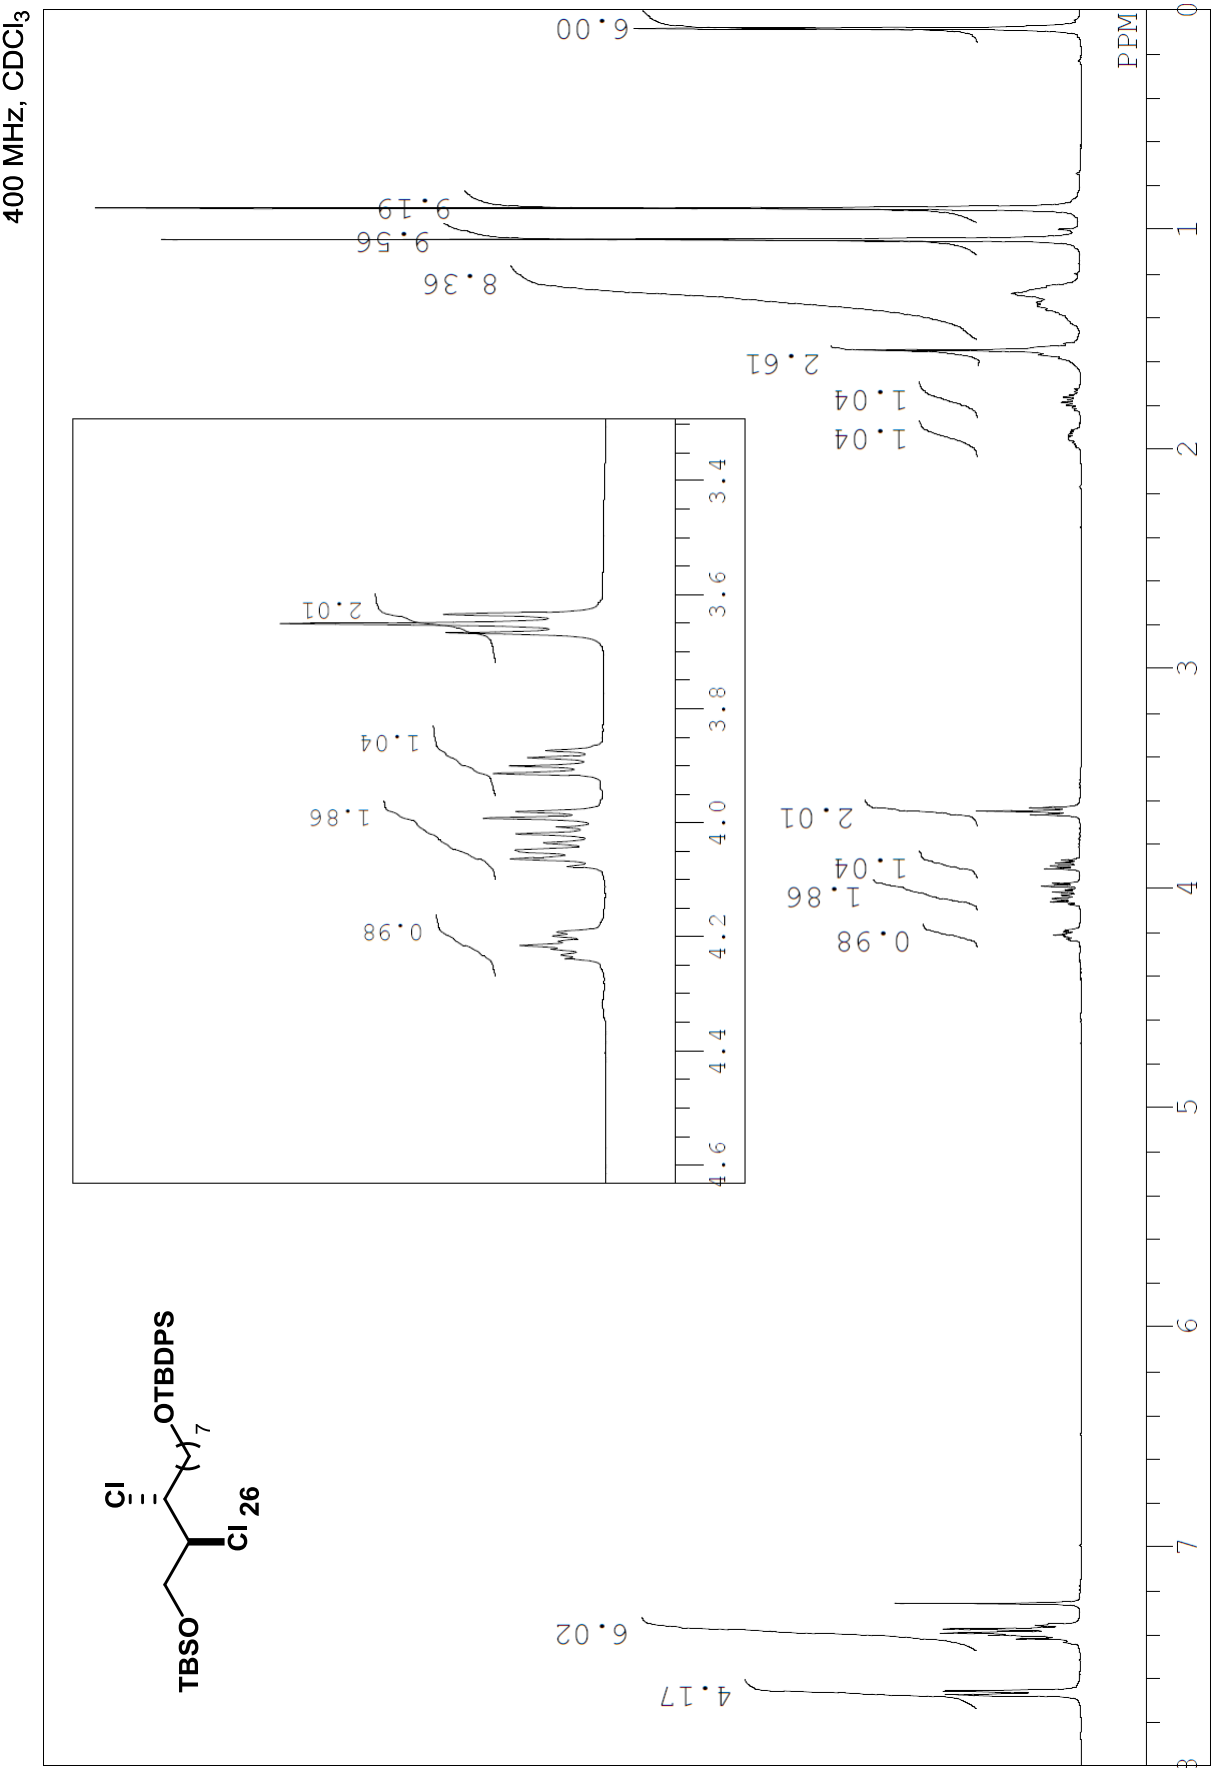

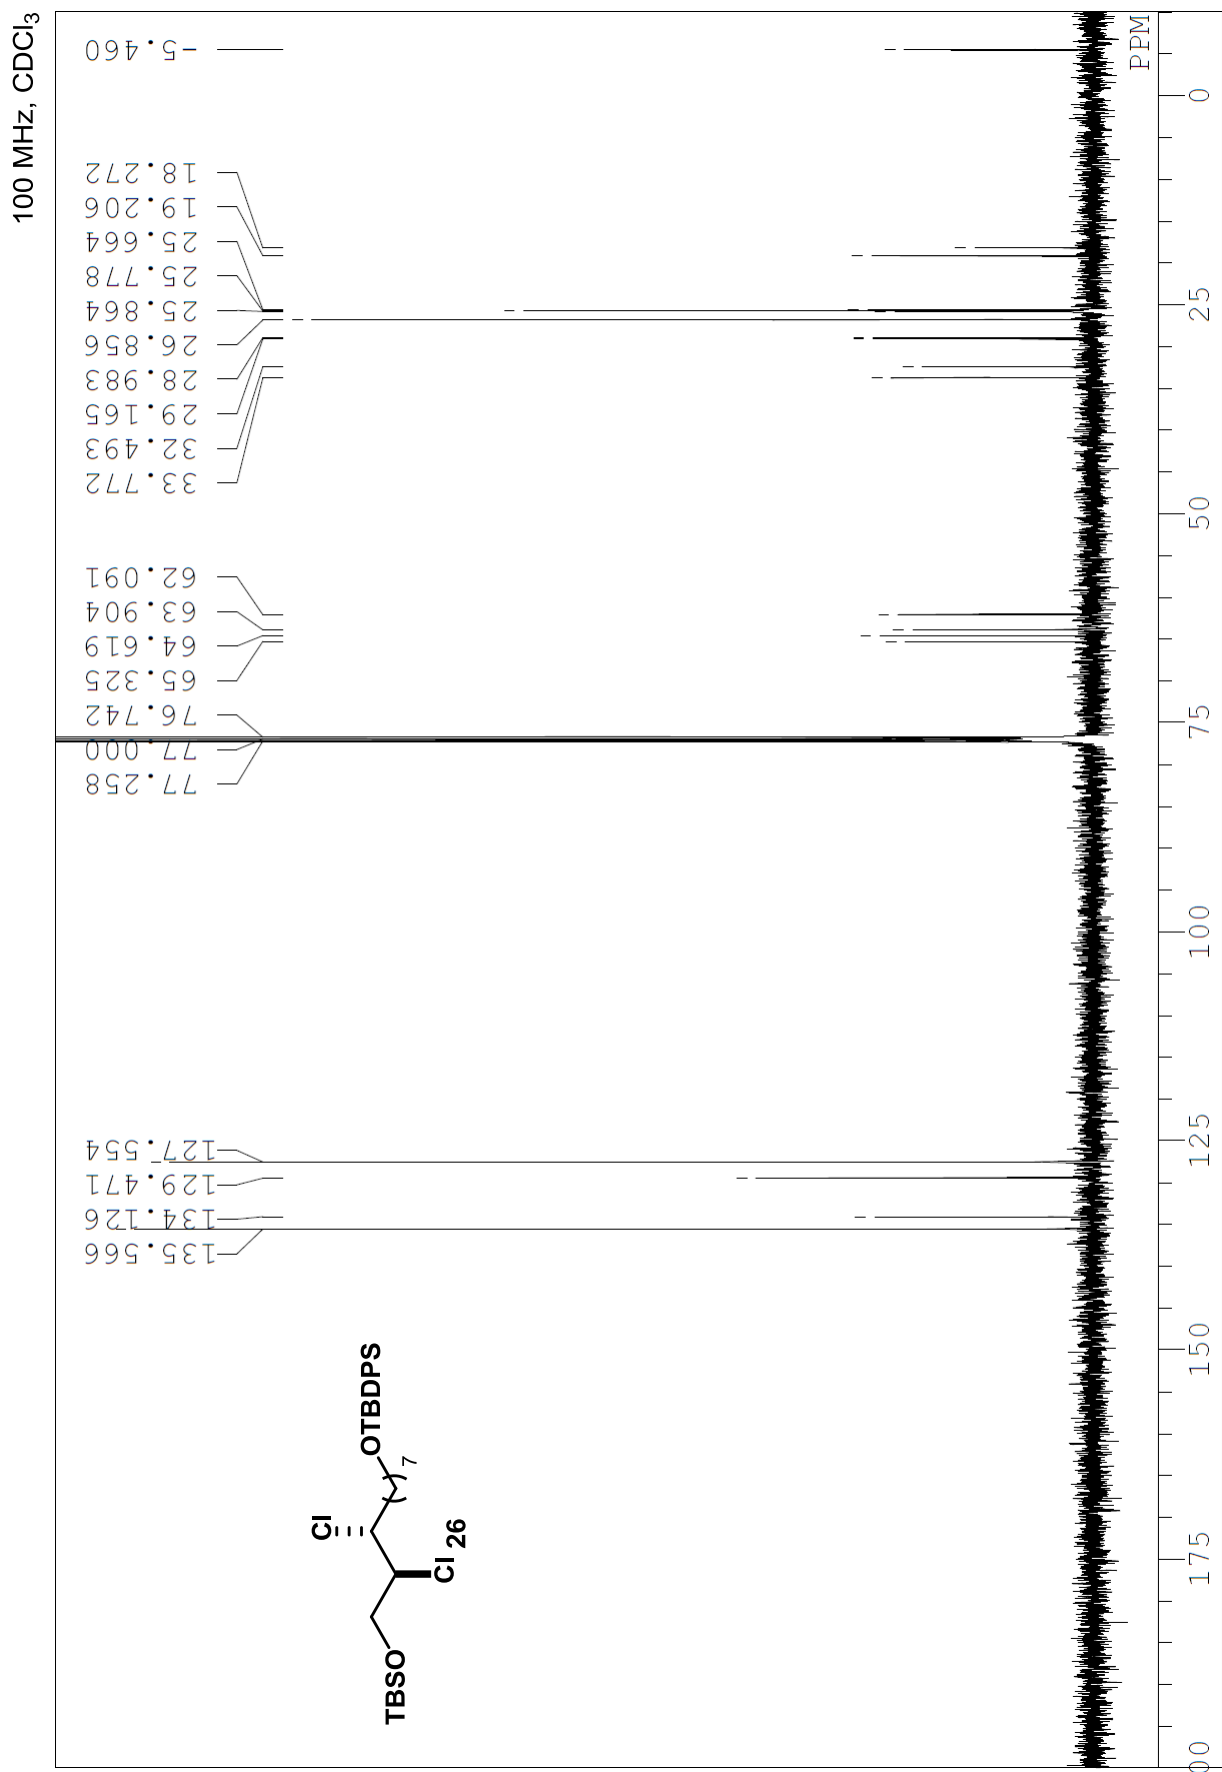



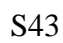

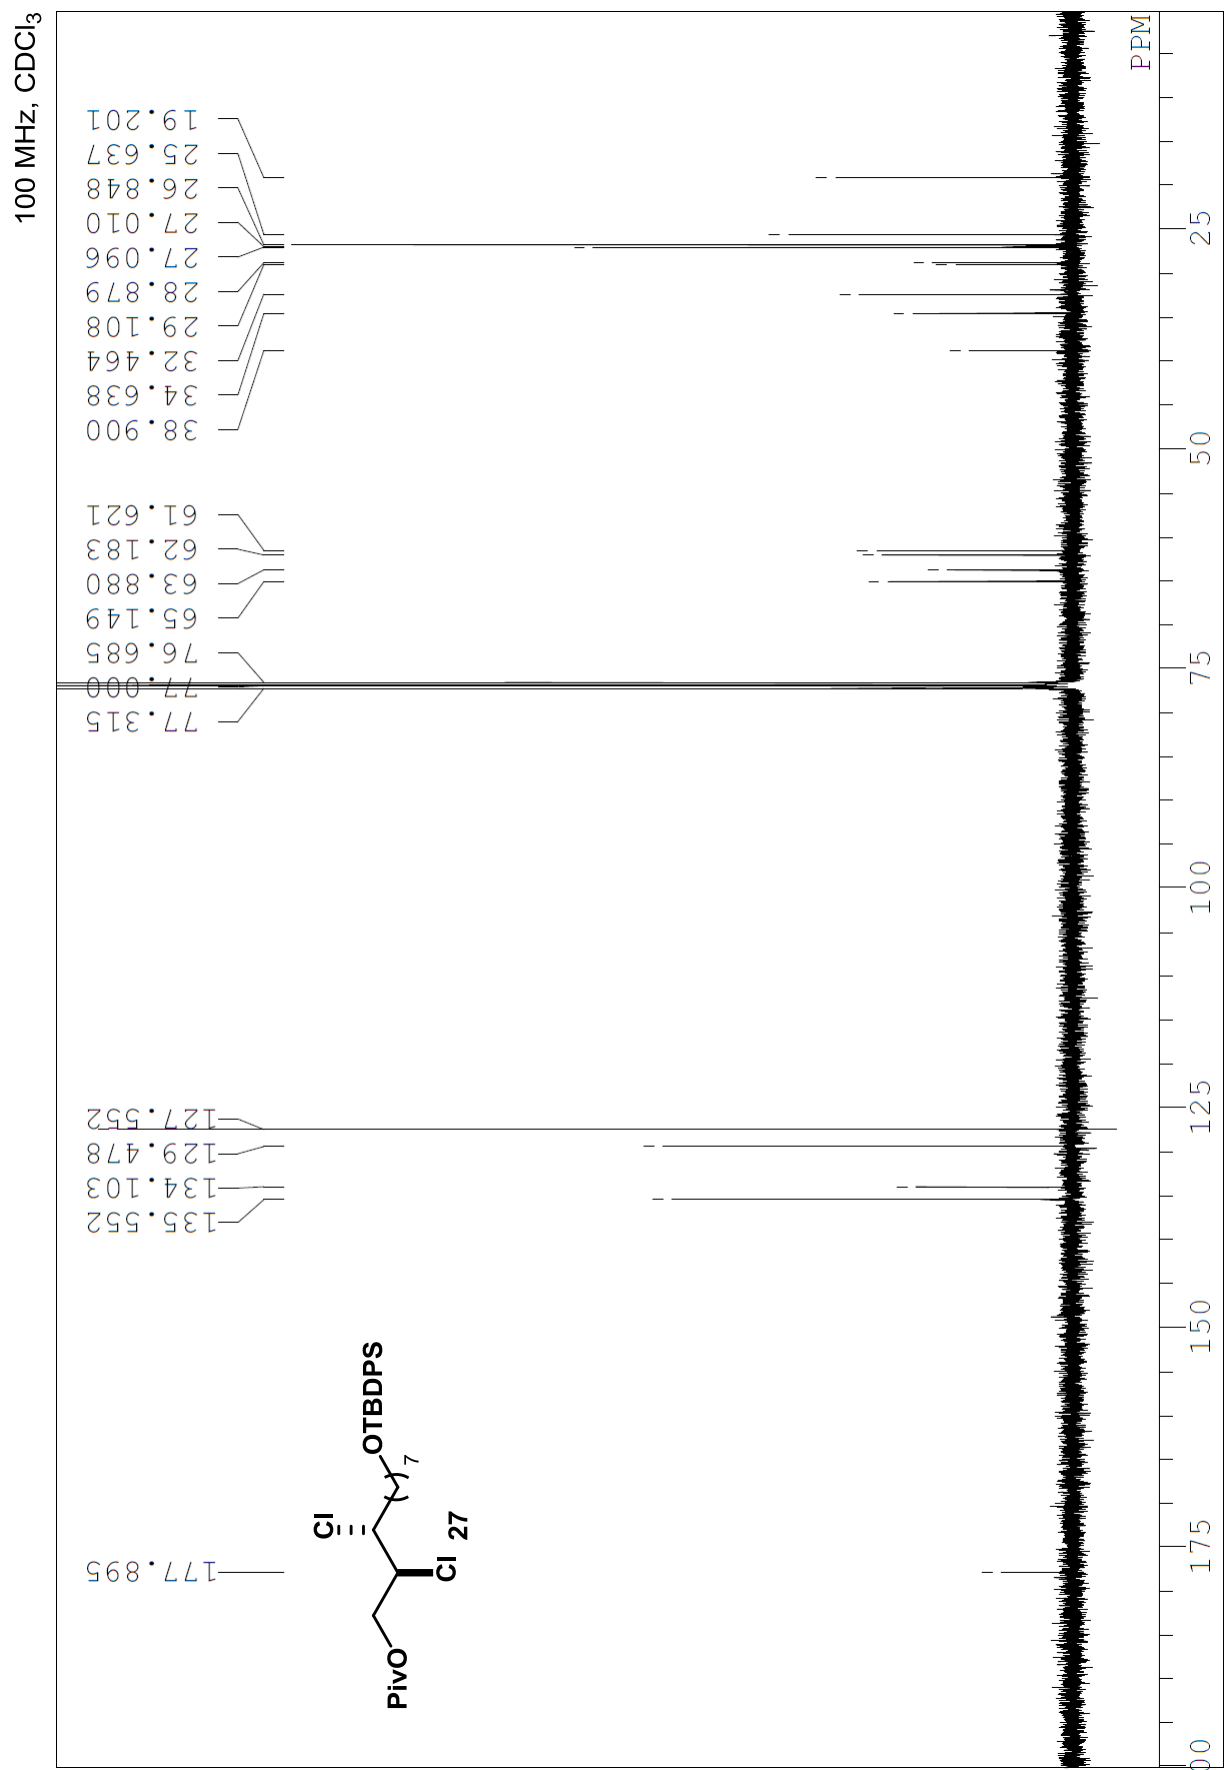

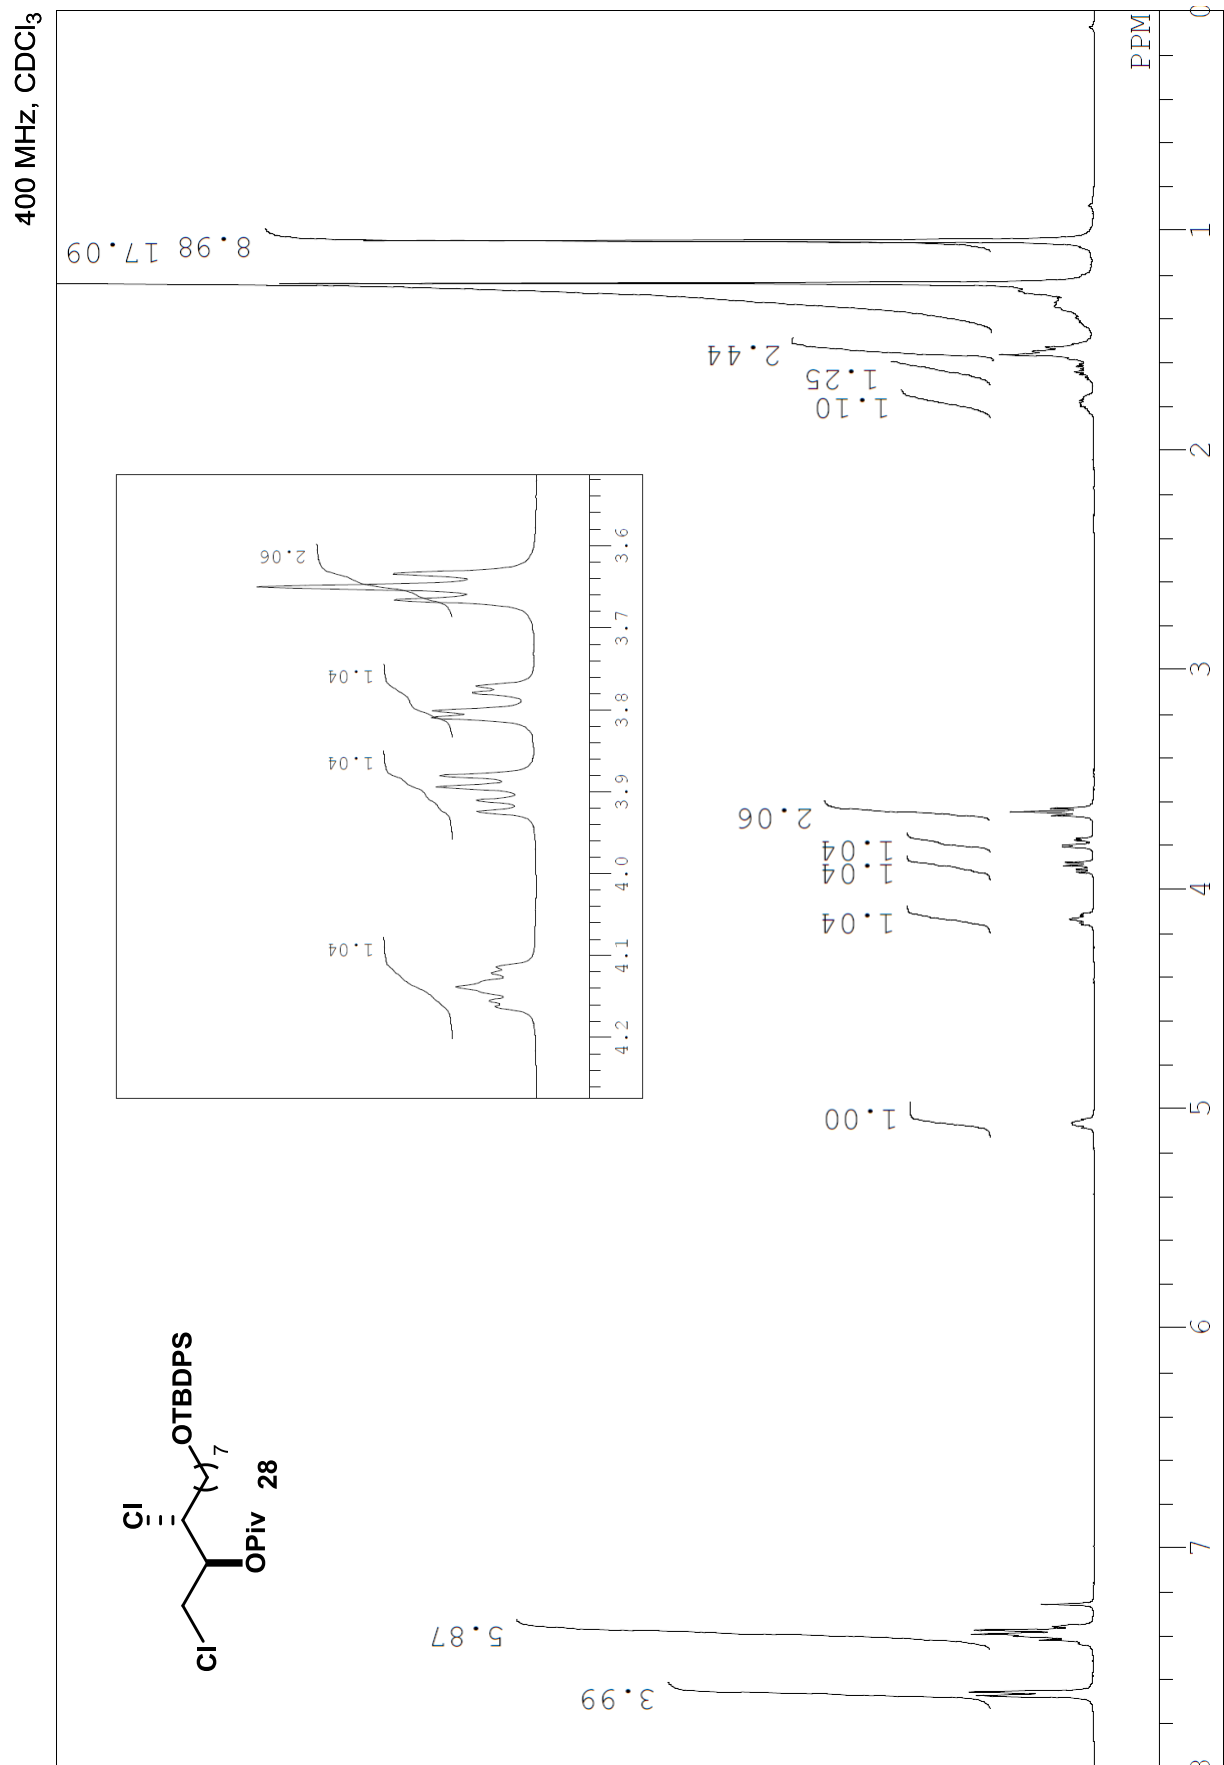

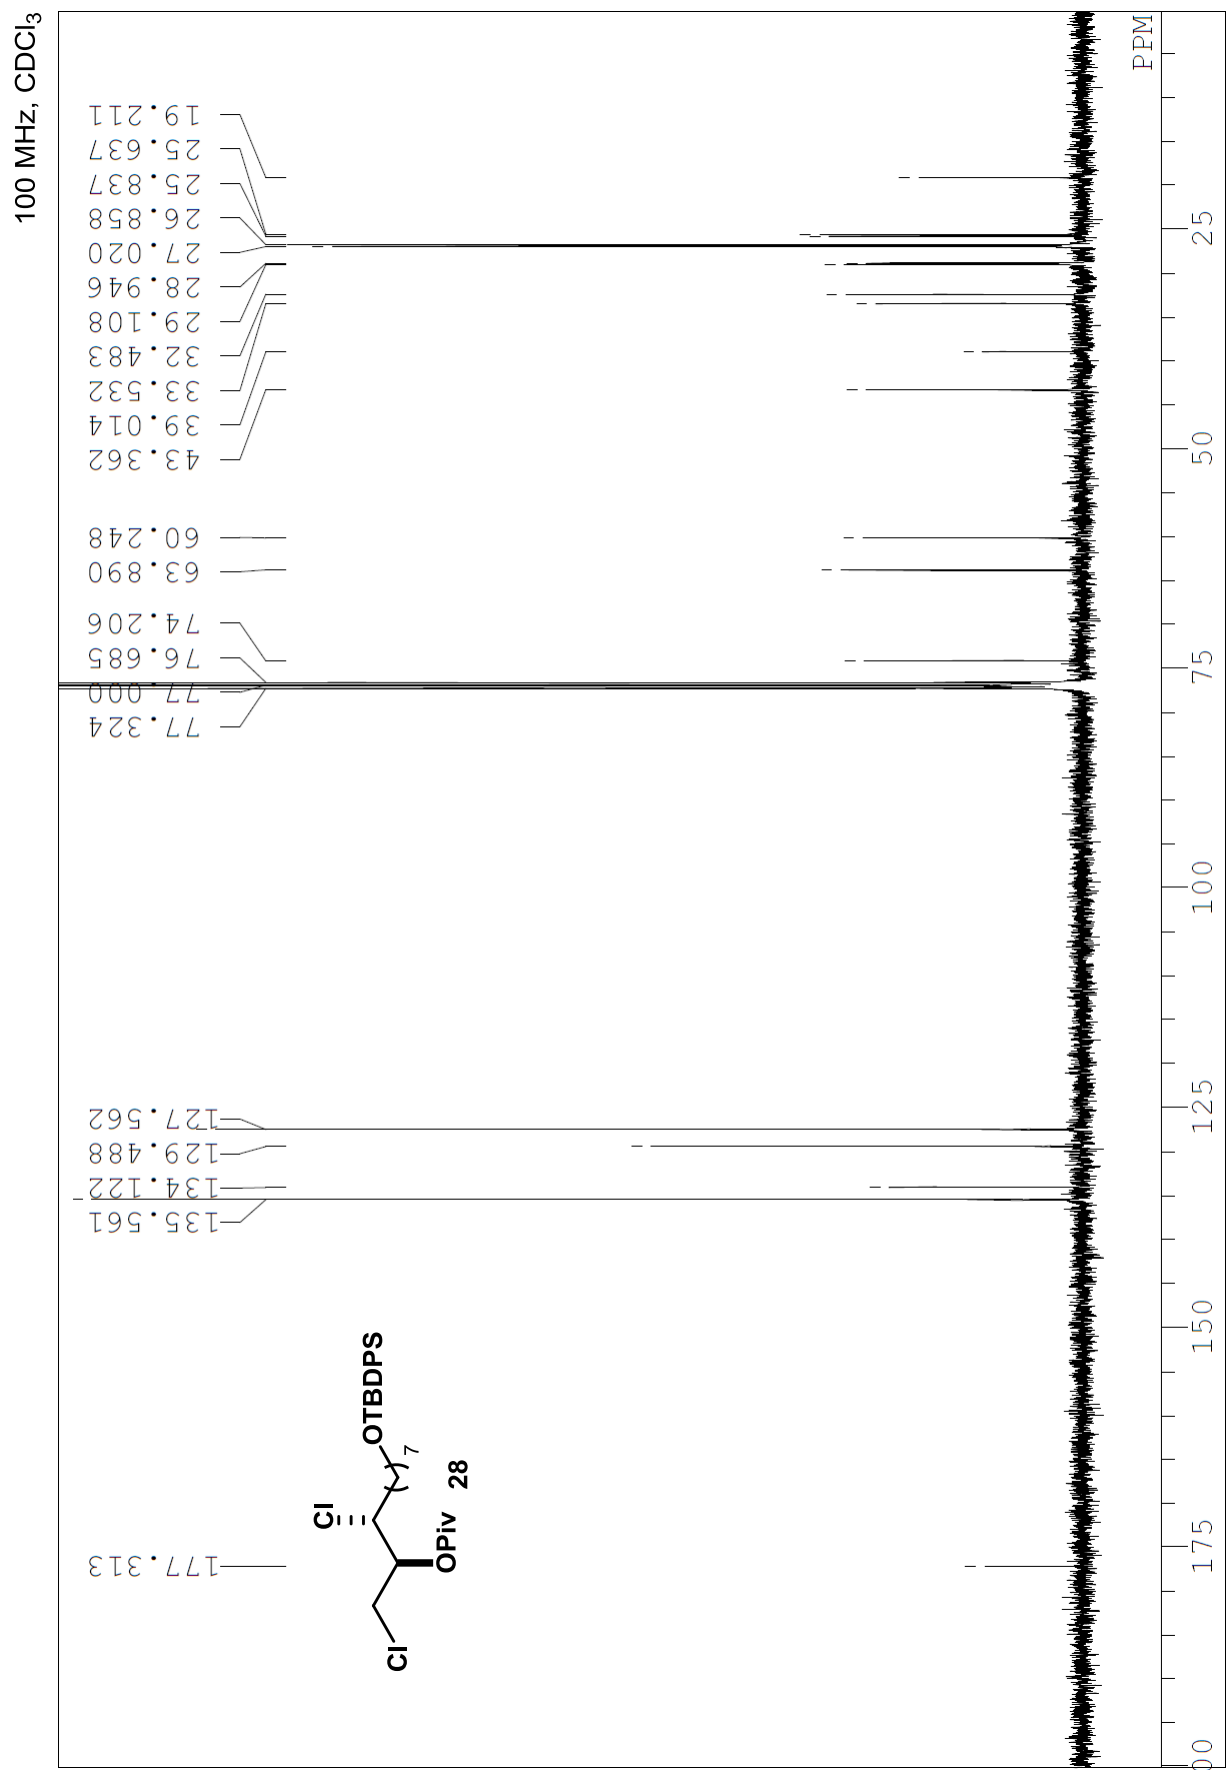

Supplement: c3ob27345h_2.pdf [file c3ob27345h_2.pdf]
